# Supplementary material
Source: publisher site journal article supplement (https://www.spandidos-publications.com/6768/downloadSupplementary)
Supplement: Supplementary file 1 [file downloadSupplementary]

## Sheet: Supplementary_Table_SIV
Table SIV. Sample information of 304 TCGA cervical cancer and Streptococcus abundance profiles.
Case uuid	Sample ID	File ID	File name	Data category	Data type	Project ID	Case ID	Sample type	Primary diagnosis	Vital status	Day	Metagenome ID.x	Streptococcus abundance	Streptococcus ra	Streptococcus status
00ad0ffe-2105-4829-a495-1c2aceb5bb31	TCGA-EK-A2R9-01A	c594066c-14b3-4047-a183-79c209cf4568	784c7898-07b5-45cf-982c-831b8c7427e2.rna_seq.augmented_star_gene_counts.tsv	Transcriptome profiling	Gene expression quantification	TCGA-CESC	TCGA-EK-A2R9	Primary tumor	"Squamous cell carcinoma, large cell, nonkeratinizing, NOS"	Alive	4	s1567	0	0	Absence
00bca18c-b3d4-45a3-8f19-034cc40449a4	TCGA-C5-A2LV-01A	f32c25c6-c803-4f48-97ea-5c2be31a53f2	4a244036-9c9f-43d1-b0a7-b976f6b1078f.rna_seq.augmented_star_gene_counts.tsv	Transcriptome profiling	Gene expression quantification	TCGA-CESC	TCGA-C5-A2LV	Primary tumor	"Squamous cell carcinoma, NOS"	Alive	2234	s1425	0	0	Absence
010a807f-9dc0-4e14-9533-dcf478f3d947	TCGA-C5-A902-01A	2dd2a180-3788-47ac-8a69-3e4619f78e77	06a61d6e-f726-44e0-82a8-762602e0cd2a.rna_seq.augmented_star_gene_counts.tsv	Transcriptome profiling	Gene expression quantification	TCGA-CESC	TCGA-C5-A902	Primary tumor	"Squamous cell carcinoma, NOS"	Alive	149	s1468	0	0	Absence
03804f9b-df7c-462c-8984-8eb3a5ed4999	TCGA-VS-A9V2-01A	906ca4cf-4499-4ad9-9064-ffa2a6554815	9ac26786-85b2-410c-b355-a5fdf4745eed.rna_seq.augmented_star_gene_counts.tsv	Transcriptome profiling	Gene expression quantification	TCGA-CESC	TCGA-VS-A9V2	Primary tumor	"Squamous cell carcinoma, NOS"	Alive	555	s1489	0	0	Absence
03c3fe57-ae85-4e45-9657-c3182ab5e124	TCGA-C5-A1BL-01A	f6e33969-8cdf-4a66-9245-26c8dec1073b	8be37a58-a3fe-417f-929d-5c265a94e3a5.rna_seq.augmented_star_gene_counts.tsv	Transcriptome profiling	Gene expression quantification	TCGA-CESC	TCGA-C5-A1BL	Primary tumor	"Squamous cell carcinoma, NOS"	Alive	5271	s1398	0	0	Absence
05026179-b1da-411e-a286-89727b1ae380	TCGA-VS-A8EH-01A	6e7a2f9e-56ba-4cde-b23d-41767fa65d27	337d68f2-0a00-43df-8356-3a8a19c6404e.rna_seq.augmented_star_gene_counts.tsv	Transcriptome profiling	Gene expression quantification	TCGA-CESC	TCGA-VS-A8EH	Primary tumor	"Squamous cell carcinoma, NOS"	Alive	986	s1469	0	0	Absence
0809ba8b-4ab6-4f43-934c-c1ccbc014a7e	TCGA-EK-A2PK-01A	d3b71a34-f6bc-452f-ace8-cc6c118ad141	25ac15a4-9306-497d-bb36-1d88e0863b77.rna_seq.augmented_star_gene_counts.tsv	Transcriptome profiling	Gene expression quantification	TCGA-CESC	TCGA-EK-A2PK	Primary tumor	"Squamous cell carcinoma, large cell, nonkeratinizing, NOS"	Alive	12	s1411	0	0	Absence
085df27c-9bc2-425a-9a49-547d692ea028	TCGA-C5-A3HF-01A	245b5d53-8990-4f65-a3ab-474be1b37576	e1ca3093-90f3-436c-814e-901f0d1b0056.rna_seq.augmented_star_gene_counts.tsv	Transcriptome profiling	Gene expression quantification	TCGA-CESC	TCGA-C5-A3HF	Primary tumor	"Mucinous adenocarcinoma, endocervical type"	Dead	543	s1546	0	0	Absence
085fb6d8-6265-484e-9307-8292386714b7	TCGA-EK-A2PM-01A	7b3c63ec-0170-4241-9115-ae625006373e	3246ffdc-be1a-4a60-8766-4cd7efcaee8a.rna_seq.augmented_star_gene_counts.tsv	Transcriptome profiling	Gene expression quantification	TCGA-CESC	TCGA-EK-A2PM	Primary tumor	"Squamous cell carcinoma, keratinizing, NOS"	Alive	18	s1384	0	0	Absence
08a52bcf-d2e9-497b-938a-4660c332e914	TCGA-C5-A1MP-01A	cfdc0234-f5b1-409d-9d6d-951f454b4b49	06407897-9ca9-4ddb-ba3d-05a2cc88b1f9.rna_seq.augmented_star_gene_counts.tsv	Transcriptome profiling	Gene expression quantification	TCGA-CESC	TCGA-C5-A1MP	Primary tumor	"Squamous cell carcinoma, NOS"	Alive	109	s1541	0	0	Absence
09329a53-d58d-4480-95d8-32043e40de6e	TCGA-C5-A3HL-01A	8e60257a-1ac8-4797-bec0-4bb6067c0360	b66d08d0-c1a9-4c53-b41c-e70bc6db7f0c.rna_seq.augmented_star_gene_counts.tsv	Transcriptome profiling	Gene expression quantification	TCGA-CESC	TCGA-C5-A3HL	Primary tumor	"Squamous cell carcinoma, keratinizing, NOS"	Alive	621	s1234	0	0	Absence
0acd1e47-1099-469b-a6d4-e00db47f57a9	TCGA-ZJ-AAXF-01A	30f4b155-2bc4-4a44-bb79-7dc9b3c31908	90e04cb0-9fa5-48d9-8f44-1dafd3b13801.rna_seq.augmented_star_gene_counts.tsv	Transcriptome profiling	Gene expression quantification	TCGA-CESC	TCGA-ZJ-AAXF	Primary tumor	"Squamous cell carcinoma, keratinizing, NOS"	Alive	0	s1604	0	0	Absence
0bd52d75-5113-4ef1-bc75-509f59eaef2b	TCGA-JW-A5VG-01A	de63e7bb-f21e-4f43-8558-d2df309ebe30	9e4a57ec-ca07-4843-b77f-eb5504a817c4.rna_seq.augmented_star_gene_counts.tsv	Transcriptome profiling	Gene expression quantification	TCGA-CESC	TCGA-JW-A5VG	Primary tumor	"Squamous cell carcinoma, NOS"	Alive	834	s1576	0	0	Absence
0c6bb7dc-45a6-4190-a7c9-b080d49fd58a	TCGA-EA-A5ZF-01A	b874f7c0-0237-428c-b0a6-de5e350722f8	e683132f-e14d-4d13-8d9a-fe2e7a6743b8.rna_seq.augmented_star_gene_counts.tsv	Transcriptome profiling	Gene expression quantification	TCGA-CESC	TCGA-EA-A5ZF	Primary tumor	"Squamous cell carcinoma, NOS"	Alive	828	s1573	0	0	Absence
0e137272-a21c-4c5e-bfd1-a774b339a753	TCGA-R2-A69V-01A	e8b0aec3-d2c4-400e-9142-e094a7dc9fac	ad6906f7-fde6-46cb-9d96-810c624b7f7a.rna_seq.augmented_star_gene_counts.tsv	Transcriptome profiling	Gene expression quantification	TCGA-CESC	TCGA-R2-A69V	Primary tumor	"Squamous cell carcinoma, large cell, nonkeratinizing, NOS"	Alive	596	s1280	279	0.02857	Presence
0e7f79cd-d188-42ea-bf96-4ba9e9b8606b	TCGA-VS-A94Y-01A	c1c3ac76-00f5-491d-9fdc-3c84ac9bae05	bcf6254a-7817-4cce-af71-2af5c2d78c0a.rna_seq.augmented_star_gene_counts.tsv	Transcriptome profiling	Gene expression quantification	TCGA-CESC	TCGA-VS-A94Y	Primary tumor	"Squamous cell carcinoma, NOS"	Dead	144	s1315	0	0	Absence
0f18ef74-019b-478d-aecd-60cc715bfdb7	TCGA-UC-A7PD-01A	db5e142f-f5d9-47b7-bffd-b74173fcf4da	f23b6b5d-8e06-46fe-a557-af991c165ca1.rna_seq.augmented_star_gene_counts.tsv	Transcriptome profiling	Gene expression quantification	TCGA-CESC	TCGA-UC-A7PD	Primary tumor	"Squamous cell carcinoma, keratinizing, NOS"	Dead	355	s1450	0	0	Absence
0fec73a1-8d3a-495b-8008-c52f190f4270	TCGA-C5-A1M5-01A	ccc6f0cc-58b0-415a-a0d9-cb4483020a70	f99e8da1-3d16-4949-9817-48c94b707016.rna_seq.augmented_star_gene_counts.tsv	Transcriptome profiling	Gene expression quantification	TCGA-CESC	TCGA-C5-A1M5	Primary tumor	"Squamous cell carcinoma, NOS"	Dead	2052	s1401	0	0	Absence
110cd100-5730-4873-9fab-2ae6c8732062	TCGA-C5-A1M8-01A	a10805bf-eb44-443b-9e4f-08d3621d4700	c5ea48f6-1909-4516-9124-9856e37bd861.rna_seq.augmented_star_gene_counts.tsv	Transcriptome profiling	Gene expression quantification	TCGA-CESC	TCGA-C5-A1M8	Primary tumor	"Squamous cell carcinoma, NOS"	Alive	919	s1224	0	0	Absence
12427b02-6e3f-461c-b271-6ab230f628e7	TCGA-C5-A3HD-01B	2e2f25ae-f16f-4603-a512-aa522b47ac79	a732e579-c45d-4741-ab68-2a9dfdd70bf8.rna_seq.augmented_star_gene_counts.tsv	Transcriptome profiling	Gene expression quantification	TCGA-CESC	TCGA-C5-A3HD	Primary tumor	"Squamous cell carcinoma, NOS"	Alive	1582	s1243	0	0	Absence
128fd280-9a04-4038-9269-9a945b9a4dc9	TCGA-FU-A770-01A	44d95ed6-61bf-4ca7-bcca-002f83bea590	fd83733a-9767-4bee-80a2-985ebb806c0f.rna_seq.augmented_star_gene_counts.tsv	Transcriptome profiling	Gene expression quantification	TCGA-CESC	TCGA-FU-A770	Primary tumor	"Adenocarcinoma, endocervical type"	Alive	34	s1448	0	0	Absence
1399d31d-9d5e-441a-b400-8b8a92a6ff8b	TCGA-LP-A5U3-01A	59c24597-31a8-4634-b38d-d759f06809bd	67c64cb6-88dc-41f9-a675-ce83dcf8204e.rna_seq.augmented_star_gene_counts.tsv	Transcriptome profiling	Gene expression quantification	TCGA-CESC	TCGA-LP-A5U3	Primary tumor	"Squamous cell carcinoma, large cell, nonkeratinizing, NOS"	Alive	25	s1577	0	0	Absence
13d72130-604c-4d79-95cc-53c2e25d91b0	TCGA-ZJ-AAX4-01A	8fc018bf-475b-4815-b857-93dcaf5913c9	d177b24a-bb6e-40df-ab2a-58bc36a7c923.rna_seq.augmented_star_gene_counts.tsv	Transcriptome profiling	Gene expression quantification	TCGA-CESC	TCGA-ZJ-AAX4	Primary tumor	"Squamous cell carcinoma, large cell, nonkeratinizing, NOS"	Alive	21	s1324	0	0	Absence
1451821e-dd49-41fa-a52e-32f8524ffe82	TCGA-UC-A7PF-01A	0ba5434b-8343-401c-8c22-57a9e7d48eb2	270a6e3e-7f27-479f-89c1-c0c3aa08b2e0.rna_seq.augmented_star_gene_counts.tsv	Transcriptome profiling	Gene expression quantification	TCGA-CESC	TCGA-UC-A7PF	Primary tumor	"Squamous cell carcinoma, NOS"	Dead	2859	s1457	0	0	Absence
14c65927-b9dd-4ef6-9917-db7bc431ff2f	TCGA-C5-A0TN-01A	47bade9d-cbd2-43a7-a5f1-641a4fc6aad5	e9f77b10-361f-4a66-a33b-7953db98f838.rna_seq.augmented_star_gene_counts.tsv	Transcriptome profiling	Gene expression quantification	TCGA-CESC	TCGA-C5-A0TN	Primary tumor	"Squamous cell carcinoma, keratinizing, NOS"	Dead	348	s1389	0	0	Absence
1636242c-12da-412e-a362-914a20add708	TCGA-EA-A5O9-01A	647127f8-ff31-4ff6-a85e-85db5361c3c9	1d1c32e1-07ab-48dd-ac60-ca65f03a6017.rna_seq.augmented_star_gene_counts.tsv	Transcriptome profiling	Gene expression quantification	TCGA-CESC	TCGA-EA-A5O9	Primary tumor	"Squamous cell carcinoma, NOS"	Alive	788	s1269	0	0	Absence
173174f8-9d95-40b0-9f88-a4bf4ccb521b	TCGA-VS-AA62-01A	d70c04cb-ea72-49eb-8f50-6ff5c7741bdd	2bf3c69a-5202-46ad-9220-5790479a8f7f.rna_seq.augmented_star_gene_counts.tsv	Transcriptome profiling	Gene expression quantification	TCGA-CESC	TCGA-VS-AA62	Primary tumor	"Squamous cell carcinoma, NOS"	Dead	469	s1323	0	0	Absence
183e8d87-3476-46bc-a989-ed4b09809227	TCGA-C5-A8XH-01A	ef80e5e4-f05e-4a4f-9291-b04b05414578	7b23135f-ee45-4e6c-98e5-feb0e1f37cf6.rna_seq.augmented_star_gene_counts.tsv	Transcriptome profiling	Gene expression quantification	TCGA-CESC	TCGA-C5-A8XH	Primary tumor	"Squamous cell carcinoma, NOS"	Dead	1394	s1298	0	0	Absence
185e1520-92ee-4af5-af15-fbeefb352c99	TCGA-C5-A2LS-01A	eb80b3eb-68fb-4046-ab90-be5fc0dff96d	4aa6dcf2-5812-48bb-9060-041dd2461315.rna_seq.augmented_star_gene_counts.tsv	Transcriptome profiling	Gene expression quantification	TCGA-CESC	TCGA-C5-A2LS	Primary tumor	"Adenocarcinoma, endocervical type"	Alive	1345	s1562	0	0	Absence
1a3d5555-7013-4f06-878a-98944f075b63	TCGA-VS-A8QA-01A	a0e3da0a-5e6a-483c-b643-21480d36b3a1	11acbaf2-102b-48a6-ad4d-d3feca49cfa2.rna_seq.augmented_star_gene_counts.tsv	Transcriptome profiling	Gene expression quantification	TCGA-CESC	TCGA-VS-A8QA	Primary tumor	"Squamous cell carcinoma, NOS"	Alive	1099	s1596	207	0.126997	Presence
1c0b5c18-8760-4483-a88c-1d1d89f61998	TCGA-JW-AAVH-01A	2cdcee16-e449-42e5-a0df-50bc161f2d02	81bfbfb5-9da8-4546-ade7-c6910ac6406b.rna_seq.augmented_star_gene_counts.tsv	Transcriptome profiling	Gene expression quantification	TCGA-CESC	TCGA-JW-AAVH	Primary tumor	"Squamous cell carcinoma, large cell, nonkeratinizing, NOS"	Alive	552	s1476	0	0	Absence
1c48393e-7de9-42f6-a6f0-2cbfb8359316	TCGA-C5-A7CK-01A	6aafe158-97c5-4603-ae1a-e0f0824ace3d	e4a32e34-bd05-40f1-966f-c703f4fa3106.rna_seq.augmented_star_gene_counts.tsv	Transcriptome profiling	Gene expression quantification	TCGA-CESC	TCGA-C5-A7CK	Primary tumor	"Squamous cell carcinoma, NOS"	Dead	4086	s1442	0	0	Absence
1cb1d2ca-dfa6-4c42-9da9-c711dc5aab5d	TCGA-VS-A9V3-01A	bb50e1b7-0de5-46ae-8b3a-5617afb11eb6	fb9d4d11-eb58-4429-be87-6582a19481b9.rna_seq.augmented_star_gene_counts.tsv	Transcriptome profiling	Gene expression quantification	TCGA-CESC	TCGA-VS-A9V3	Primary tumor	"Squamous cell carcinoma, NOS"	Alive	540	s1493	0	0	Absence
1d730565-ffa9-4cc7-a713-c4b5b7bbb29f	TCGA-MU-A8JM-01A	7330bf93-9fd4-4f48-8033-814c968d3a4d	ba4e184a-5969-46db-bc1e-1995cfdeee34.rna_seq.augmented_star_gene_counts.tsv	Transcriptome profiling	Gene expression quantification	TCGA-CESC	TCGA-MU-A8JM	Primary tumor	"Squamous cell carcinoma, large cell, nonkeratinizing, NOS"	Alive	607	s1474	0	0	Absence
1dfb4565-81e1-4a1b-bb59-9b5629d6c447	TCGA-EX-A8YF-01A	a72562d9-187f-4b26-aa5f-309562a3af72	32cfc635-4f2f-4c11-aad0-9c627374f917.rna_seq.augmented_star_gene_counts.tsv	Transcriptome profiling	Gene expression quantification	TCGA-CESC	TCGA-EX-A8YF	Primary tumor	"Squamous cell carcinoma, NOS"	Alive	473	s1302	0	0	Absence
1e4d7755-b971-4c6e-a2b9-dd83d92bc4c9	TCGA-EX-A69M-01A	357f2681-c57e-4941-a108-cddad1fc0800	322813f9-c491-4e03-ae58-758529038af2.rna_seq.augmented_star_gene_counts.tsv	Transcriptome profiling	Gene expression quantification	TCGA-CESC	TCGA-EX-A69M	Primary tumor	"Squamous cell carcinoma, large cell, nonkeratinizing, NOS"	Dead	253	s1284	0	0	Absence
1ef20703-3684-4b43-a31f-892073208377	TCGA-LP-A5U2-01A	a519b346-6cb5-4f3d-b20d-526521275737	0aa549e1-bb9a-4489-b815-1c22817100d8.rna_seq.augmented_star_gene_counts.tsv	Transcriptome profiling	Gene expression quantification	TCGA-CESC	TCGA-LP-A5U2	Primary tumor	"Adenocarcinoma, endocervical type"	Alive	9	s1437	0	0	Absence
1fe594d9-4240-49ee-8afd-c7d16a377181	TCGA-EX-A1H6-01B	4b409994-2674-4619-9815-bd93aaa9d6bd	72ac3cfa-31f8-4371-867d-ab897b2b7cb9.rna_seq.augmented_star_gene_counts.tsv	Transcriptome profiling	Gene expression quantification	TCGA-CESC	TCGA-EX-A1H6	Primary tumor	"Adenocarcinoma, NOS"	Alive	241	s1256	0	0	Absence
20280122-a66a-4c83-8f25-0b9d97558dc2	TCGA-JX-A3Q0-01A	cff2ceb8-0d9f-4d61-98a2-fb04c0b4aa9a	be03b8ad-9576-4dec-98bb-1c08cb76921d.rna_seq.augmented_star_gene_counts.tsv	Transcriptome profiling	Gene expression quantification	TCGA-CESC	TCGA-JX-A3Q0	Primary tumor	"Squamous cell carcinoma, NOS"	Alive	6375	s1586	0	0	Absence
21254cb0-68f3-4ecc-8d9a-73fb0e994c5b	TCGA-VS-A8QF-01A	dc9a2333-f5df-4af4-8f14-c27beeb8bf1c	ed349cd4-b5ea-47b1-a026-46574c086c9e.rna_seq.augmented_star_gene_counts.tsv	Transcriptome profiling	Gene expression quantification	TCGA-CESC	TCGA-VS-A8QF	Primary tumor	"Squamous cell carcinoma, NOS"	Alive	1800	s1460	0	0	Absence
23f011e2-c025-4494-8016-2140cc8d4bce	TCGA-C5-A1MJ-01A	3eda8e7b-c987-4d34-8c00-5580562f7605	7faf4015-7f89-4d75-b35d-63e40cf1b927.rna_seq.augmented_star_gene_counts.tsv	Transcriptome profiling	Gene expression quantification	TCGA-CESC	TCGA-C5-A1MJ	Primary tumor	"Adenocarcinoma, NOS"	Dead	14	s1225	0	0	Absence
240ef385-decc-48f7-a798-a81b4ab0410e	TCGA-VS-A94X-01A	69a92b90-0cb8-48d1-ab51-f3bb0bea8260	31c30e2e-c6f7-47ac-b349-50bac8070b2b.rna_seq.augmented_star_gene_counts.tsv	Transcriptome profiling	Gene expression quantification	TCGA-CESC	TCGA-VS-A94X	Primary tumor	"Squamous cell carcinoma, NOS"	Dead	506	s1316	735	0.58028	Presence
262311a0-7a10-4934-8fba-11ee581ad738	TCGA-C5-A1BF-01B	c8402841-2e74-4375-990f-8bc289479eea	905f10fc-d043-4740-beeb-a86e37d4bc96.rna_seq.augmented_star_gene_counts.tsv	Transcriptome profiling	Gene expression quantification	TCGA-CESC	TCGA-C5-A1BF	Primary tumor	"Squamous cell carcinoma, NOS"	Dead	570	s1393	501	0.0155307	Presence
27d2b645-f1bf-4486-b0b5-273681b58625	TCGA-VS-A8QM-01A	074ea3be-a90b-4417-bcf4-134299dd81ac	2c9a3411-ed70-4051-90b3-4bb4e46196c3.rna_seq.augmented_star_gene_counts.tsv	Transcriptome profiling	Gene expression quantification	TCGA-CESC	TCGA-VS-A8QM	Primary tumor	"Squamous cell carcinoma, NOS"	Dead	951	s1595	0	0	Absence
287ce10e-31c8-4b10-9858-6e45451dfbe4	TCGA-C5-A1MN-01A	f02cd4bf-4016-464e-967f-7e519afd8a9a	4a58a162-f6c1-4a7c-a6d2-48f1e8efd950.rna_seq.augmented_star_gene_counts.tsv	Transcriptome profiling	Gene expression quantification	TCGA-CESC	TCGA-C5-A1MN	Primary tumor	"Squamous cell carcinoma, NOS"	Dead	1245	s1394	0	0	Absence
29a48c93-bade-4346-a901-de35a6537337	TCGA-DS-A1OB-01A	54c876ae-3c98-46ce-a588-e2f7c5c8735f	782e1ee9-37d9-4c09-9adc-7d67c6bb63ee.rna_seq.augmented_star_gene_counts.tsv	Transcriptome profiling	Gene expression quantification	TCGA-CESC	TCGA-DS-A1OB	Primary tumor	"Squamous cell carcinoma, NOS"	Dead	861	s1226	0	0	Absence
2b6d2c15-8bcc-41ab-84d6-601442f4378b	TCGA-C5-A1BE-01B	6f7c3102-e08f-4e5a-982c-82a151d020ca	b0f51243-6185-4a9e-8d3e-5b065737981c.rna_seq.augmented_star_gene_counts.tsv	Transcriptome profiling	Gene expression quantification	TCGA-CESC	TCGA-C5-A1BE	Primary tumor	"Squamous cell carcinoma, large cell, nonkeratinizing, NOS"	Dead	2094	s1543	0	0	Absence
2c600a58-98ed-4572-9b6f-edba2719790c	TCGA-VS-A9UQ-01A	bec7d53a-7b0b-4c96-ad54-9b49c8fdc62f	565e41a8-1eb8-47aa-961e-d3896c81750e.rna_seq.augmented_star_gene_counts.tsv	Transcriptome profiling	Gene expression quantification	TCGA-CESC	TCGA-VS-A9UQ	Primary tumor	"Mucinous adenocarcinoma, endocervical type"	Alive	1263	s1333	69	0.0300642	Presence
2c736c5c-9d32-4522-acfd-6620bc291ace	TCGA-VS-A8EB-01A	839e0208-d427-4679-a7dd-cae570b8aab3	9aebbdb9-ad76-4ad8-813d-3f115d96191b.rna_seq.augmented_star_gene_counts.tsv	Transcriptome profiling	Gene expression quantification	TCGA-CESC	TCGA-VS-A8EB	Primary tumor	"Squamous cell carcinoma, NOS"	Dead	305	s1318	25851	8.66622	Presence
2d34e9a3-298c-4365-b7a1-a507c7f069cd	TCGA-EA-A556-01A	3e9eff1f-5fa8-45fc-ba81-7201a78aa477	24bda804-df8e-415b-81a6-fdf0e6c53ac8.rna_seq.augmented_star_gene_counts.tsv	Transcriptome profiling	Gene expression quantification	TCGA-CESC	TCGA-EA-A556	Primary tumor	"Adenocarcinoma, NOS"	Alive	453	s1431	0	0	Absence
2da977fc-8b46-4c40-9636-b12fd36a98e4	TCGA-DG-A2KL-01A	72cb857b-aa6c-4675-bfe8-14c172b62fee	e2cd9593-5a47-433e-bab2-05a00448717b.rna_seq.augmented_star_gene_counts.tsv	Transcriptome profiling	Gene expression quantification	TCGA-CESC	TCGA-DG-A2KL	Primary tumor	"Squamous cell carcinoma, keratinizing, NOS"	Alive	1367	s1422	0	0	Absence
2e08a89e-4035-4782-b54f-f98eef5db80d	TCGA-VS-A8EJ-01A	6eb47075-fa0b-4873-9ecb-c595c009924e	b5576c6f-eb84-431f-bd86-51effca529cf.rna_seq.augmented_star_gene_counts.tsv	Transcriptome profiling	Gene expression quantification	TCGA-CESC	TCGA-VS-A8EJ	Primary tumor	"Squamous cell carcinoma, NOS"	Dead	607	s1458	0	0	Absence
2f261704-d600-4226-90d5-d51ba416b55c	TCGA-MA-AA3Y-01A	4451d0ad-9475-4c25-9bf0-9acd1e5b8d8e	0b970f0c-3fa5-4972-87d4-9a2d013b88b0.rna_seq.augmented_star_gene_counts.tsv	Transcriptome profiling	Gene expression quantification	TCGA-CESC	TCGA-MA-AA3Y	Primary tumor	"Squamous cell carcinoma, keratinizing, NOS"	Alive	542	s1310	0	0	Absence
2f6a0e87-1e6c-41f3-93e0-3e505fa654b0	TCGA-VS-A94W-01A	5ed37c49-73ea-4cd0-bf7a-d428e35324c6	3fd4111b-4ff9-4a3c-9a0b-a5af0c378d58.rna_seq.augmented_star_gene_counts.tsv	Transcriptome profiling	Gene expression quantification	TCGA-CESC	TCGA-VS-A94W	Primary tumor	"Squamous cell carcinoma, NOS"	Alive	1243	s1473	0	0	Absence
3143822c-66c4-4b58-8d29-e92d065ff049	TCGA-C5-A1MH-01A	2d38647e-dfaf-41bd-8dc0-f90c0ae44f35	c4fbf368-9e12-4cda-adfa-c6679bec1529.rna_seq.augmented_star_gene_counts.tsv	Transcriptome profiling	Gene expression quantification	TCGA-CESC	TCGA-C5-A1MH	Primary tumor	"Squamous cell carcinoma, NOS"	Dead	1186	s1231	0	0	Absence
3223fec6-1d35-419a-8ee9-7c5885b8be1e	TCGA-LP-A4AX-01A	b85f24d5-9fb6-4a05-bda6-bae9cefaaceb	29f1634b-bbb8-413e-8554-40240d098d83.rna_seq.augmented_star_gene_counts.tsv	Transcriptome profiling	Gene expression quantification	TCGA-CESC	TCGA-LP-A4AX	Primary tumor	"Squamous cell carcinoma, NOS"	Alive	380	s1578	132	0.0860821	Presence
3265f9c1-7242-4c7d-b4ad-b6519ee94f84	TCGA-EA-A43B-01A	81f62f62-ac62-4b1f-a4b7-c3f88a35e9ba	cdfbd915-7c98-406d-850a-447337130ef8.rna_seq.augmented_star_gene_counts.tsv	Transcriptome profiling	Gene expression quantification	TCGA-CESC	TCGA-EA-A43B	Primary tumor	"Squamous cell carcinoma, keratinizing, NOS"	Alive	791	s1445	0	0	Absence
33bc6504-d9ab-4b64-a87c-012915f36644	TCGA-C5-A8ZZ-01A	e7736f4c-5cfb-479d-ad90-ed1ea236230f	e5366465-1648-49da-be5e-bdc05edae8fd.rna_seq.augmented_star_gene_counts.tsv	Transcriptome profiling	Gene expression quantification	TCGA-CESC	TCGA-C5-A8ZZ	Primary tumor	"Squamous cell carcinoma, keratinizing, NOS"	Alive	636	s1593	0	0	Absence
34629eb8-0c5e-4910-8e13-bf7d6a1e337f	TCGA-JX-A3Q8-01A	177573d6-eb54-4ab1-be04-12e1ee87a0da	a5becc4c-c455-42b2-a09b-9fbffe32dacb.rna_seq.augmented_star_gene_counts.tsv	Transcriptome profiling	Gene expression quantification	TCGA-CESC	TCGA-JX-A3Q8	Primary tumor	"Adenocarcinoma, endocervical type"	Alive	1357	s1550	0	0	Absence
35d677b6-0487-44d3-bbba-651eac7e0635	TCGA-EA-A5ZD-01A	d5e4445b-29d9-4d6f-bdad-1f06bd82747d	edec746e-8c39-48d4-8d40-183c2a7ac65d.rna_seq.augmented_star_gene_counts.tsv	Transcriptome profiling	Gene expression quantification	TCGA-CESC	TCGA-EA-A5ZD	Primary tumor	"Squamous cell carcinoma, NOS"	Alive	830	s1433	0	0	Absence
36605f5f-245c-41e5-a9db-705373da7923	TCGA-DR-A0ZL-01A	20ed4744-11d8-4f35-a29e-5ecdada00985	efbb2a86-0b07-4f35-88ad-1cea8da3d7e9.rna_seq.augmented_star_gene_counts.tsv	Transcriptome profiling	Gene expression quantification	TCGA-CESC	TCGA-DR-A0ZL	Primary tumor	"Squamous cell carcinoma, NOS"	Alive	2669	s1399	591	0.069055	Presence
374f614a-bcd1-4283-ac6f-fc27ddc79987	TCGA-C5-A1ML-01A	071e901a-f9b7-429c-a82a-7b291cd90347	efcae857-7fd5-40af-9702-a95f14f038d3.rna_seq.augmented_star_gene_counts.tsv	Transcriptome profiling	Gene expression quantification	TCGA-CESC	TCGA-C5-A1ML	Primary tumor	"Squamous cell carcinoma, NOS"	Dead	636	s1396	0	0	Absence
3923a64a-f8d7-4e3e-9218-cee642da21db	TCGA-BI-A0VS-01A	fb02c7c7-b66b-4e69-a818-c8348e25ac44	65da067d-ad76-4cf8-a921-576ff6b5a94f.rna_seq.augmented_star_gene_counts.tsv	Transcriptome profiling	Gene expression quantification	TCGA-CESC	TCGA-BI-A0VS	Primary tumor	"Squamous cell carcinoma, NOS"	Alive	1735	s1240	0	0	Absence
39a3120c-0889-4a10-816a-e07528a35f7a	TCGA-BI-A0VR-01A	8a97bf8d-3b2e-474a-b163-b766650303fc	bf6e0884-f5bd-4e34-82d8-33166df9bcf9.rna_seq.augmented_star_gene_counts.tsv	Transcriptome profiling	Gene expression quantification	TCGA-CESC	TCGA-BI-A0VR	Primary tumor	"Squamous cell carcinoma, NOS"	Alive	1505	s1544	0	0	Absence
3a3a9b5e-12a1-41f5-a54c-d4c1e0eccb9e	TCGA-Q1-A73P-01A	08d84f38-e726-4929-ab4f-047918105f14	12e291b4-8090-40f0-975c-4ffebb4f695a.rna_seq.augmented_star_gene_counts.tsv	Transcriptome profiling	Gene expression quantification	TCGA-CESC	TCGA-Q1-A73P	Primary tumor	"Adenocarcinoma, endocervical type"	Alive	483	s1276	0	0	Absence
3ac62513-b5f4-4063-aabd-dad08a1f56fb	TCGA-EA-A3Y4-01A	ab12c84b-64f4-4524-82ce-76f5016d7b0e	5de0021f-a59a-434f-886c-cfeb243a74d4.rna_seq.augmented_star_gene_counts.tsv	Transcriptome profiling	Gene expression quantification	TCGA-CESC	TCGA-EA-A3Y4	Primary tumor	"Squamous cell carcinoma, NOS"	Alive	1122	s1261	0	0	Absence
3c5b2452-014b-495f-b86a-f522ed84bc3b	TCGA-EA-A3HT-01A	11ffde52-971b-4a41-8eb8-773d0b4044ab	659b8687-b1c7-42c5-b023-fe0878472746.rna_seq.augmented_star_gene_counts.tsv	Transcriptome profiling	Gene expression quantification	TCGA-CESC	TCGA-EA-A3HT	Primary tumor	"Squamous cell carcinoma, NOS"	Alive	954	s1238	0	0	Absence
3d190f07-2f79-4ee6-9f63-0b563dc05c74	TCGA-VS-A950-01A	64c23e52-7b5b-47ba-a6f0-24f505c3b564	7733dec4-b276-4ec6-9d53-c7b2d5f508da.rna_seq.augmented_star_gene_counts.tsv	Transcriptome profiling	Gene expression quantification	TCGA-CESC	TCGA-VS-A950	Primary tumor	"Squamous cell carcinoma, NOS"	Alive	1221	s1607	0	0	Absence
3df6abe2-2123-4bfa-a4e4-88df5f940c04	TCGA-JX-A3PZ-01A	671b7a91-3b3f-421f-bc59-b72a21d2d2ce	83592162-d81c-471e-9927-8c27e80b733f.rna_seq.augmented_star_gene_counts.tsv	Transcriptome profiling	Gene expression quantification	TCGA-CESC	TCGA-JX-A3PZ	Primary tumor	"Squamous cell carcinoma, keratinizing, NOS"	Dead	642	s1446	0	0	Absence
3edb62c1-25ad-4deb-a005-e881a887d06a	TCGA-EA-A439-01A	64e29ac8-6b53-4428-b4e2-58fbcec23a95	ec774a00-c825-4990-bb32-f97efcd126be.rna_seq.augmented_star_gene_counts.tsv	Transcriptome profiling	Gene expression quantification	TCGA-CESC	TCGA-EA-A439	Primary tumor	"Squamous cell carcinoma, NOS"	Alive	965	s1570	0	0	Absence
40a86987-e77f-4977-92b1-8217796e1938	TCGA-ZJ-AAXI-01A	21fde879-ceda-47e9-8e78-7a764b8f7113	32582838-4c77-44ed-bc4d-d483f1cf6887.rna_seq.augmented_star_gene_counts.tsv	Transcriptome profiling	Gene expression quantification	TCGA-CESC	TCGA-ZJ-AAXI	Primary tumor	"Squamous cell carcinoma, large cell, nonkeratinizing, NOS"	Alive	0	s1499	0	0	Absence
45cadcf3-ea98-4063-9255-5c18d6a5cbab	TCGA-EK-A2PL-01A	d03e35f4-64de-4c62-bddd-4e4f29287468	c1b6295c-ed94-46dd-9d00-012a2cbd4167.rna_seq.augmented_star_gene_counts.tsv	Transcriptome profiling	Gene expression quantification	TCGA-CESC	TCGA-EK-A2PL	Primary tumor	"Squamous cell carcinoma, large cell, nonkeratinizing, NOS"	Alive	13	s1387	0	0	Absence
46adfbbe-3add-41cd-a388-b1ee0790bf62	TCGA-Q1-A6DT-01A	3b92220f-e8c8-40e8-9f81-5287fa2197d8	3edc8423-3f4e-4d58-b8b8-408c8c50d5f0.rna_seq.augmented_star_gene_counts.tsv	Transcriptome profiling	Gene expression quantification	TCGA-CESC	TCGA-Q1-A6DT	Primary tumor	"Squamous cell carcinoma, large cell, nonkeratinizing, NOS"	Dead	275	s1274	0	0	Absence
46c67dd6-8e66-411d-ad05-95daa9005eb2	TCGA-DS-A1OA-01A	827f3dd1-eb9c-4e08-8499-be100218b579	1dd4d813-213c-4f6c-a1a5-9276bf411d25.rna_seq.augmented_star_gene_counts.tsv	Transcriptome profiling	Gene expression quantification	TCGA-CESC	TCGA-DS-A1OA	Primary tumor	"Squamous cell carcinoma, NOS"	Dead	879	s1223	3690	0.0622608	Presence
4756acc0-4e96-44d4-b359-04d64dc7eb84	TCGA-ZX-AA5X-01A	71745596-697d-416b-a8a3-096f858ba317	bc2372c3-b67a-4245-9ba2-83bb9dbc5764.rna_seq.augmented_star_gene_counts.tsv	Transcriptome profiling	Gene expression quantification	TCGA-CESC	TCGA-ZX-AA5X	Primary tumor	"Squamous cell carcinoma, NOS"	Alive	119	s1325	0	0	Absence
4770ec81-9174-4d2a-af54-70c00696fb0b	TCGA-VS-A9UU-01A	9bc7d31b-7d46-4069-ae89-4bedb7393c01	7024d0ee-8e3d-42e0-938b-e95fa102d9d4.rna_seq.augmented_star_gene_counts.tsv	Transcriptome profiling	Gene expression quantification	TCGA-CESC	TCGA-VS-A9UU	Primary tumor	"Squamous cell carcinoma, NOS"	Alive	442	s1494	0	0	Absence
48d81b1e-cd75-4b55-a0b2-c331be2a88ae	TCGA-WL-A834-01A	a2d9e451-7d13-465e-be7a-1410a31d9a65	49c6c591-f0b5-450e-adce-3ecf611d3039.rna_seq.augmented_star_gene_counts.tsv	Transcriptome profiling	Gene expression quantification	TCGA-CESC	TCGA-WL-A834	Primary tumor	"Squamous cell carcinoma, NOS"	Alive	791	s1454	0	0	Absence
4da121da-9193-4ac5-8206-03cb1f7c2c14	TCGA-VS-A9UO-01A	760d72c4-50a2-4ecf-ac58-a2da0f3d8707	bf6bb083-7d52-4aba-b5d7-9d474d36c86e.rna_seq.augmented_star_gene_counts.tsv	Transcriptome profiling	Gene expression quantification	TCGA-CESC	TCGA-VS-A9UO	Primary tumor	"Mucinous adenocarcinoma, endocervical type"	Alive	1456	s1498	0	0	Absence
4ed1616e-8c62-4104-bcbe-26d7059f04d0	TCGA-C5-A7X3-01A	bb53cf32-4a2b-4920-b5ba-d479a7577e15	4b6f6190-25da-4a2c-b997-b6f6d8234eb6.rna_seq.augmented_star_gene_counts.tsv	Transcriptome profiling	Gene expression quantification	TCGA-CESC	TCGA-C5-A7X3	Primary tumor	"Squamous cell carcinoma, large cell, nonkeratinizing, NOS"	Dead	284	s1296	0	0	Absence
4f4e8834-a716-42e6-bd51-60d80a619202	TCGA-MY-A5BF-01A	8439b3b2-ea14-43f4-b7ab-e18089e4c5a4	d405b97c-1f8c-4c32-b409-702047015275.rna_seq.augmented_star_gene_counts.tsv	Transcriptome profiling	Gene expression quantification	TCGA-CESC	TCGA-MY-A5BF	Primary tumor	"Squamous cell carcinoma, keratinizing, NOS"	Alive	634	s1264	0	0	Absence
4f514ed4-3be6-44bc-a531-210027846459	TCGA-C5-A1MF-01A	e604c082-be80-4a47-a7f9-66fd90d0ef72	92477499-7388-4b4e-9ef3-b3f0af1ddec6.rna_seq.augmented_star_gene_counts.tsv	Transcriptome profiling	Gene expression quantification	TCGA-CESC	TCGA-C5-A1MF	Primary tumor	"Squamous cell carcinoma, NOS"	Alive	1617	s1402	0	0	Absence
5194a247-cfee-4c11-9475-cf5521a8c6e3	TCGA-EK-A2PG-01A	f25421fa-1e77-46c1-bb76-d8c45801e72c	c3d0d966-fa48-4bdb-bc4a-c0bc96939250.rna_seq.augmented_star_gene_counts.tsv	Transcriptome profiling	Gene expression quantification	TCGA-CESC	TCGA-EK-A2PG	Primary tumor	"Squamous cell carcinoma, NOS"	Alive	46	s1549	0	0	Absence
53d99a89-6ebd-4637-91db-7ce43ebc6b8b	TCGA-UC-A7PG-01A	b7342f74-bb29-4ce5-aa0a-3b8e2d733f3a	b1d44675-d971-4ae9-8299-b649a171bc91.rna_seq.augmented_star_gene_counts.tsv	Transcriptome profiling	Gene expression quantification	TCGA-CESC	TCGA-UC-A7PG	Primary tumor	"Squamous cell carcinoma, NOS"	Dead	370	s1601	0	0	Absence
53eac147-7eb8-4c54-a982-5e058d6749f8	TCGA-4J-AA1J-01A	0ed6cbf4-3db1-48b0-b921-8b9397f564b3	b4f5cc56-d533-424d-8fa9-fb56bc38f6f9.rna_seq.augmented_star_gene_counts.tsv	Transcriptome profiling	Gene expression quantification	TCGA-CESC	TCGA-4J-AA1J	Primary tumor	"Squamous cell carcinoma, NOS"	Alive	542	s1479	0	0	Absence
53eb4c4e-0719-476f-9b2b-279d438d7710	TCGA-JW-A5VI-01A	21fdabc5-a448-48d5-9078-fcce486a61e7	9174f97b-1c21-4f45-906e-8fea6bbdf727.rna_seq.augmented_star_gene_counts.tsv	Transcriptome profiling	Gene expression quantification	TCGA-CESC	TCGA-JW-A5VI	Primary tumor	"Squamous cell carcinoma, large cell, nonkeratinizing, NOS"	Alive	747	s1272	0	0	Absence
55add854-e63f-4335-bea9-23c3eb1e766a	TCGA-PN-A8MA-01A	e460babd-29ba-4bf0-826e-c1bc7b6127cb	92fd9150-cec1-4d77-a30d-66f94edabf41.rna_seq.augmented_star_gene_counts.tsv	Transcriptome profiling	Gene expression quantification	TCGA-CESC	TCGA-PN-A8MA	Primary tumor	"Squamous cell carcinoma, large cell, nonkeratinizing, NOS"	Alive	90	s1600	0	0	Absence
57902b91-be42-441d-8807-a5ea9c21b214	TCGA-C5-A7X8-01A	4a4afbc9-884b-4292-a70e-814c2441dc22	1aff7967-6727-43e6-9d40-018b3b0ffac7.rna_seq.augmented_star_gene_counts.tsv	Transcriptome profiling	Gene expression quantification	TCGA-CESC	TCGA-C5-A7X8	Primary tumor	"Mucinous adenocarcinoma, endocervical type"	Alive	83	s1594	0	0	Absence
5798d741-c198-4c14-bcc2-e3b17caf1be3	TCGA-VS-A8Q9-01A	5bf0adf9-35ef-494f-99c6-ad1e75ed0f57	05e7d06f-4091-44d8-9ecb-35d4ec547493.rna_seq.augmented_star_gene_counts.tsv	Transcriptome profiling	Gene expression quantification	TCGA-CESC	TCGA-VS-A8Q9	Primary tumor	"Squamous cell carcinoma, NOS"	Alive	1630	s1308	0	0	Absence
58bdcace-0047-456e-a225-68953edafe5e	TCGA-IR-A3LC-01A	73861302-d85f-4e87-ab70-67846a5583fd	6c61d75d-08da-4ddc-a1bc-ed8c1466cc94.rna_seq.augmented_star_gene_counts.tsv	Transcriptome profiling	Gene expression quantification	TCGA-CESC	TCGA-IR-A3LC	Primary tumor	"Squamous cell carcinoma, NOS"	Alive	3935	s1416	0	0	Absence
5916af71-0262-42cf-af4b-eac830a8b419	TCGA-ZJ-AAXT-01A	39051009-ae3c-4748-a345-bf7f9440990d	8b16f4bb-d93d-4fb7-b023-fd51392d1e04.rna_seq.augmented_star_gene_counts.tsv	Transcriptome profiling	Gene expression quantification	TCGA-CESC	TCGA-ZJ-AAXT	Primary tumor	"Squamous cell carcinoma, large cell, nonkeratinizing, NOS"	Alive	0	s1331	0	0	Absence
5aeac31a-176a-4f93-a376-a93a670821bb	TCGA-2W-A8YY-01A	d58ab3de-a87e-467a-b2a7-957c769e4687	69fdc3a5-bf2d-4301-af3e-e58c2a3f139e.rna_seq.augmented_star_gene_counts.tsv	Transcriptome profiling	Gene expression quantification	TCGA-CESC	TCGA-2W-A8YY	Primary tumor	Adenosquamous carcinoma	Alive	533	s1591	0	0	Absence
5c326e9b-85e2-4673-9033-c11827467e1a	TCGA-C5-A7UC-01A	37a046cb-1c9c-4e72-a80c-8ccfcec148e2	4829423f-8c21-4068-b1aa-03cd4399fd83.rna_seq.augmented_star_gene_counts.tsv	Transcriptome profiling	Gene expression quantification	TCGA-CESC	TCGA-C5-A7UC	Primary tumor	"Squamous cell carcinoma, large cell, nonkeratinizing, NOS"	Dead	523	s1295	0	0	Absence
5c72bda2-2ec0-455f-ab27-7247fd5ffff9	TCGA-Q1-A73Q-01A	59f827f3-24f7-434a-a43e-b1567b13b743	1065dae3-c2f6-40fc-b91e-e8759b386dc3.rna_seq.augmented_star_gene_counts.tsv	Transcriptome profiling	Gene expression quantification	TCGA-CESC	TCGA-Q1-A73Q	Primary tumor	"Squamous cell carcinoma, keratinizing, NOS"	Alive	284	s1279	0	0	Absence
5dbd5436-696e-40fa-881b-c2386573ac68	TCGA-Q1-A6DW-01A	ba6bdc9e-2a9e-4a43-89d7-fa4c35e63ee8	f246a78d-6ba8-4e25-b137-60148242fd74.rna_seq.augmented_star_gene_counts.tsv	Transcriptome profiling	Gene expression quantification	TCGA-CESC	TCGA-Q1-A6DW	Primary tumor	"Squamous cell carcinoma, large cell, nonkeratinizing, NOS"	Alive	534	s1278	0	0	Absence
5e39485a-ac6b-496d-9984-2ea8075f6a9b	TCGA-EA-A5ZE-01A	7f1c5680-be00-4840-8679-39d7f5041e6c	29431d2d-f0c7-4217-aa8e-2fd043237341.rna_seq.augmented_star_gene_counts.tsv	Transcriptome profiling	Gene expression quantification	TCGA-CESC	TCGA-EA-A5ZE	Primary tumor	"Squamous cell carcinoma, NOS"	Alive	829	s1265	0	0	Absence
5e972e96-7271-439a-905c-6e308c1ef29e	TCGA-MU-A5YI-01A	2c32b690-17d2-4cab-a525-7afae13f8ba3	f0f1387e-d3a9-436d-bac6-b82c8f99392b.rna_seq.augmented_star_gene_counts.tsv	Transcriptome profiling	Gene expression quantification	TCGA-CESC	TCGA-MU-A5YI	Primary tumor	"Squamous cell carcinoma, NOS"	Alive	1053	s1275	105	0.0408893	Presence
5ed3c95a-10d0-4cd5-a54d-523e81587fb1	TCGA-DS-A0VK-01A	db322c8d-c5f1-47fd-a942-9daef8f4ddbc	a3f30117-e556-4498-847a-b79aad0b83f4.rna_seq.augmented_star_gene_counts.tsv	Transcriptome profiling	Gene expression quantification	TCGA-CESC	TCGA-DS-A0VK	Primary tumor	"Squamous cell carcinoma, NOS"	Dead	1118	s1381	0	0	Absence
5f22e050-c172-4f2d-a1f9-6cb749b6ef98	TCGA-ZJ-AAXN-01A	040f858c-85e3-433c-aace-e2a026fe6afc	9eeac5f1-bf93-4ae8-af05-de53e5615bfe.rna_seq.augmented_star_gene_counts.tsv	Transcriptome profiling	Gene expression quantification	TCGA-CESC	TCGA-ZJ-AAXN	Primary tumor	"Squamous cell carcinoma, large cell, nonkeratinizing, NOS"	Alive	0	s1606	0	0	Absence
60cfa29f-4770-4ee4-aa37-787f53155662	TCGA-VS-A9UD-01A	eff6f04c-419d-4fc9-9c2c-eec2c0e208a4	7c2d1ee3-0e66-4760-8795-d4aaf422cf0f.rna_seq.augmented_star_gene_counts.tsv	Transcriptome profiling	Gene expression quantification	TCGA-CESC	TCGA-VS-A9UD	Primary tumor	"Squamous cell carcinoma, NOS"	Alive	739	s1332	0	0	Absence
61eb08d0-ea01-45e7-884b-ac3d6070172a	TCGA-EK-A2RL-01A	5dbadde9-cecc-497f-ac92-d9d7cd1c871b	6f0f84c3-0311-4f23-aa10-6211d9270c70.rna_seq.augmented_star_gene_counts.tsv	Transcriptome profiling	Gene expression quantification	TCGA-CESC	TCGA-EK-A2RL	Primary tumor	"Adenocarcinoma, endocervical type"	Dead	1453	s1406	0	0	Absence
6248f2a3-0da9-419f-ab77-c3f6f4353eb5	TCGA-DG-A2KH-01A	34f2e71a-eb93-4c63-9902-b44986cc37d1	e3ae00e6-2165-4e11-a1f4-fa2708a1c63b.rna_seq.augmented_star_gene_counts.tsv	Transcriptome profiling	Gene expression quantification	TCGA-CESC	TCGA-DG-A2KH	Primary tumor	"Adenocarcinoma, NOS"	Alive	34	s1247	0	0	Absence
638035f6-2909-4a44-980f-468ac5d74e18	TCGA-EA-A3HR-01A	6328b2af-9b9e-49e2-b68a-ab6f59f3dbeb	5f89e3c4-5ff0-4805-ab0e-d6e50021c0ef.rna_seq.augmented_star_gene_counts.tsv	Transcriptome profiling	Gene expression quantification	TCGA-CESC	TCGA-EA-A3HR	Primary tumor	"Squamous cell carcinoma, NOS"	Alive	940	s1555	0	0	Absence
63bffdb1-bc08-4175-8be7-d7a056d19816	TCGA-DS-A3LQ-01A	f6357f34-50a3-4f4e-a216-11f840c1f091	35da7349-116c-47ee-80fe-bdd2ee71757b.rna_seq.augmented_star_gene_counts.tsv	Transcriptome profiling	Gene expression quantification	TCGA-CESC	TCGA-DS-A3LQ	Primary tumor	"Squamous cell carcinoma, NOS"	Alive	699	s1244	0	0	Absence
63dcfa32-c69e-45ad-bea3-ae672acb11c6	TCGA-FU-A40J-01A	8d60590d-7aba-4cb2-9eb2-db2b356cb2c5	4f1184ce-9b87-41de-9cc1-0d76a0f03c38.rna_seq.augmented_star_gene_counts.tsv	Transcriptome profiling	Gene expression quantification	TCGA-CESC	TCGA-FU-A40J	Primary tumor	"Adenocarcinoma, endocervical type"	Alive	426	s1568	0	0	Absence
66229dd6-c771-4455-a90c-c66fb40cf7fe	TCGA-IR-A3L7-01A	ebf609f8-c184-466c-a1ab-4d4c2c5f0f8e	87b943fe-0981-401f-81bd-9fdf7524aea2.rna_seq.augmented_star_gene_counts.tsv	Transcriptome profiling	Gene expression quantification	TCGA-CESC	TCGA-IR-A3L7	Primary tumor	"Squamous cell carcinoma, NOS"	Alive	4483	s1551	0	0	Absence
67195401-9099-4ca9-9790-f42bcb815289	TCGA-GH-A9DA-01A	13c5cc24-14f4-4658-b423-7a9612096fef	97443f37-8482-41a9-b584-eb4574619be4.rna_seq.augmented_star_gene_counts.tsv	Transcriptome profiling	Gene expression quantification	TCGA-CESC	TCGA-GH-A9DA	Primary tumor	"Squamous cell carcinoma, NOS"	Alive	540	s1303	0	0	Absence
674e010c-7ad4-4dc2-86b0-284cd4560633	TCGA-FU-A3HY-01A	5eb90ba9-1f1b-41e8-b092-b4f0366e57dd	7d621795-d6b3-4d4c-897e-e5e05cd0e4f3.rna_seq.augmented_star_gene_counts.tsv	Transcriptome profiling	Gene expression quantification	TCGA-CESC	TCGA-FU-A3HY	Primary tumor	"Squamous cell carcinoma, large cell, nonkeratinizing, NOS"	Alive	954	s1553	0	0	Absence
6813c53c-b256-4115-ad90-24d75328779e	TCGA-JW-A5VH-01A	a1fb7d95-3ddf-458f-bc92-949d7b2bb8a2	e5e88ea0-10c6-4424-943a-161b11b26cbe.rna_seq.augmented_star_gene_counts.tsv	Transcriptome profiling	Gene expression quantification	TCGA-CESC	TCGA-JW-A5VH	Primary tumor	"Squamous cell carcinoma, NOS"	Dead	100	s1273	0	0	Absence
6817bb3e-1f8a-457c-9ab0-31ccda8b6868	TCGA-VS-A9UZ-01A	e80255e2-843b-4028-84f0-e58e094e317b	87b5715b-07f7-4e4b-8cb0-ea669cf71aa9.rna_seq.augmented_star_gene_counts.tsv	Transcriptome profiling	Gene expression quantification	TCGA-CESC	TCGA-VS-A9UZ	Primary tumor	"Mucinous adenocarcinoma, endocervical type"	Alive	2044	s1338	0	0	Absence
6868ba1d-b612-454c-8146-74af2f573d76	TCGA-FU-A3WB-01A	26980518-79b7-4d0d-ad83-4f13656698da	ae47f7ed-67d7-484a-86ce-ccb5499eef8f.rna_seq.augmented_star_gene_counts.tsv	Transcriptome profiling	Gene expression quantification	TCGA-CESC	TCGA-FU-A3WB	Primary tumor	"Squamous cell carcinoma, NOS"	Alive	491	s1253	0	0	Absence
690a7b2a-7dc5-4504-9372-70c8b55e81c7	TCGA-EK-A2H1-01A	d671a87f-4fee-4427-a043-f58613c337d5	729e6603-6a2a-41d6-a613-03921276e485.rna_seq.augmented_star_gene_counts.tsv	Transcriptome profiling	Gene expression quantification	TCGA-CESC	TCGA-EK-A2H1	Primary tumor	"Squamous cell carcinoma, large cell, nonkeratinizing, NOS"	Alive	799	s1251	399	0.121152	Presence
6949c03e-067a-49a5-b48d-e9380a1b0b27	TCGA-VS-A9UH-01A	b1f085a9-c21f-46b9-8be5-848021349e3b	7009632a-cc44-4a91-9830-cfd5b4dfb7b3.rna_seq.augmented_star_gene_counts.tsv	Transcriptome profiling	Gene expression quantification	TCGA-CESC	TCGA-VS-A9UH	Primary tumor	"Squamous cell carcinoma, NOS"	Alive	1427	s1492	0	0	Absence
69baba9f-19c2-4947-95dc-0dd3412929ba	TCGA-VS-A94Z-01A	80744415-dea9-4e41-845d-c329129dfba7	d47a35c0-ac2e-4d7a-90f7-0c47dd652260.rna_seq.augmented_star_gene_counts.tsv	Transcriptome profiling	Gene expression quantification	TCGA-CESC	TCGA-VS-A94Z	Primary tumor	"Squamous cell carcinoma, NOS"	Alive	1015	s1314	0	0	Absence
6a18d184-d3a2-49c2-bd4b-9c18f91b98c7	TCGA-EA-A50E-01A	d5ab446b-bbc7-456b-a878-89328021db0d	b0b6a064-43d5-4151-abff-2f13bfc9f716.rna_seq.augmented_star_gene_counts.tsv	Transcriptome profiling	Gene expression quantification	TCGA-CESC	TCGA-EA-A50E	Primary tumor	"Squamous cell carcinoma, large cell, nonkeratinizing, NOS"	Dead	227	s1262	0	0	Absence
6b60bf8e-29a1-4c6b-9ead-aea4ddc99064	TCGA-ZJ-AAXJ-01A	1f0b038e-8730-4fd0-a616-ac9d1af54cc2	2fc0fd36-1413-4be7-bd43-8dff5a8aa17c.rna_seq.augmented_star_gene_counts.tsv	Transcriptome profiling	Gene expression quantification	TCGA-CESC	TCGA-ZJ-AAXJ	Primary tumor	"Squamous cell carcinoma, keratinizing, NOS"	Alive	0	s1602	132	0.11835	Presence
6b74c07a-9932-4a80-8296-9db08d0c6964	TCGA-EX-A1H5-01A	2069f884-c793-4f72-a678-508e45aaf3c4	f75662df-26a1-46e2-a6e4-5491a6ec0505.rna_seq.augmented_star_gene_counts.tsv	Transcriptome profiling	Gene expression quantification	TCGA-CESC	TCGA-EX-A1H5	Primary tumor	"Squamous cell carcinoma, NOS"	Alive	619	s1227	0	0	Absence
6bcf8b41-7abc-4b6f-899a-1f67b4ada765	TCGA-HM-A4S6-01A	b83b2242-0dcc-4a25-b2bd-dc134a671122	9666467c-9327-4b94-afdb-424b8d392d28.rna_seq.augmented_star_gene_counts.tsv	Transcriptome profiling	Gene expression quantification	TCGA-CESC	TCGA-HM-A4S6	Primary tumor	"Squamous cell carcinoma, NOS"	Alive	454	s1429	0	0	Absence
6bf00b63-89f8-420c-8d36-f680fb0908b1	TCGA-EA-A3HQ-01A	c7495564-a9e4-4813-a63a-44fc719d1db9	8f3b94f7-3cc0-4856-beb6-adcd08df070c.rna_seq.augmented_star_gene_counts.tsv	Transcriptome profiling	Gene expression quantification	TCGA-CESC	TCGA-EA-A3HQ	Primary tumor	"Squamous cell carcinoma, NOS"	Alive	1136	s1418	0	0	Absence
6c3c8219-74ab-4e54-81f5-84d4d5884252	TCGA-VS-A8Q8-01A	3c2a763c-0f57-4879-842c-674ca5c001c2	44c5f875-a78e-45f0-b60b-c86d68ce6ae2.rna_seq.augmented_star_gene_counts.tsv	Transcriptome profiling	Gene expression quantification	TCGA-CESC	TCGA-VS-A8Q8	Primary tumor	"Squamous cell carcinoma, NOS"	Dead	978	s1299	0	0	Absence
6d01421e-d533-4967-8422-97fbc0fb0895	TCGA-VS-A9U7-01A	bc66e478-55f3-4495-b2de-d97e3b190a9f	e8bb8589-b7e2-4dcf-91af-56efdd8bd722.rna_seq.augmented_star_gene_counts.tsv	Transcriptome profiling	Gene expression quantification	TCGA-CESC	TCGA-VS-A9U7	Primary tumor	"Squamous cell carcinoma, NOS"	Alive	1472	s1486	201	0.182447	Presence
6dca2a6f-7f2c-4524-b528-396a889b2a3f	TCGA-EX-A69L-01A	da0c9063-2d2d-4a21-8dad-d0508782130f	5b2b03a7-8aa2-4afc-8797-001e1e02304e.rna_seq.augmented_star_gene_counts.tsv	Transcriptome profiling	Gene expression quantification	TCGA-CESC	TCGA-EX-A69L	Primary tumor	"Squamous cell carcinoma, large cell, nonkeratinizing, NOS"	Alive	602	s1282	0	0	Absence
6e01248b-c551-4f52-8066-cb2d26eb6394	TCGA-FU-A3YQ-01A	4c8c4696-09a1-4b1d-aa17-fd2ad77eb91d	432cafa0-97f7-4aca-92b9-796792938447.rna_seq.augmented_star_gene_counts.tsv	Transcriptome profiling	Gene expression quantification	TCGA-CESC	TCGA-FU-A3YQ	Primary tumor	"Squamous cell carcinoma, NOS"	Alive	861	s1558	0	0	Absence
6f9d21c0-3b88-450d-a249-3e9bafba2dfa	TCGA-EA-A1QS-01A	8cbe185d-d778-4ea2-9e33-d6483c1dedb9	ffb4ba05-74e2-4634-83c3-7f518cc5316e.rna_seq.augmented_star_gene_counts.tsv	Transcriptome profiling	Gene expression quantification	TCGA-CESC	TCGA-EA-A1QS	Primary tumor	"Squamous cell carcinoma, large cell, nonkeratinizing, NOS"	Alive	1203	s1423	0	0	Absence
6ff12a54-10da-4941-bfea-7b66e19b4be9	TCGA-FU-A3HZ-01A	b911c4a5-e6e4-40ad-ba7b-612cd9f3a9ee	2a85a4ed-ee55-44df-b29e-52d0c51d23e4.rna_seq.augmented_star_gene_counts.tsv	Transcriptome profiling	Gene expression quantification	TCGA-CESC	TCGA-FU-A3HZ	Primary tumor	"Squamous cell carcinoma, large cell, nonkeratinizing, NOS"	Alive	1103	s1382	0	0	Absence
7067b7da-fb1b-4827-8fe6-9433ed672d3b	TCGA-LP-A7HU-01A	3dd3700a-dbcb-429b-8b66-106d0a9469a5	3fe411a2-bc7b-485d-bc59-0c5bd712c8b8.rna_seq.augmented_star_gene_counts.tsv	Transcriptome profiling	Gene expression quantification	TCGA-CESC	TCGA-LP-A7HU	Primary tumor	"Adenocarcinoma, endocervical type"	Alive	406	s1589	0	0	Absence
7218aa6f-3345-484f-a329-a3b6169a67c7	TCGA-FU-A3TQ-01A	d08be593-a7c8-4c98-9c72-d5ca5c09b478	791bec90-6f3e-43af-9892-4291e356eb10.rna_seq.augmented_star_gene_counts.tsv	Transcriptome profiling	Gene expression quantification	TCGA-CESC	TCGA-FU-A3TQ	Primary tumor	"Squamous cell carcinoma, NOS"	Alive	795	s1424	0	0	Absence
73aa428a-4288-45f8-8a53-cec173dcc61f	TCGA-Q1-A5R3-01A	5ae78ad8-d48c-4a08-8e54-4fcadd511096	8c3dc8c5-0039-4921-8a31-693611141e53.rna_seq.augmented_star_gene_counts.tsv	Transcriptome profiling	Gene expression quantification	TCGA-CESC	TCGA-Q1-A5R3	Primary tumor	"Squamous cell carcinoma, NOS"	Alive	485	s1435	1650	0.0221941	Presence
748aada0-448f-4523-9893-3d9618fdbe18	TCGA-DR-A0ZM-01A	5ffda6da-15d6-471b-8529-809a8b3fceb7	18491da8-9cc9-4983-8afd-123105d81e03.rna_seq.augmented_star_gene_counts.tsv	Transcriptome profiling	Gene expression quantification	TCGA-CESC	TCGA-DR-A0ZM	Primary tumor	"Squamous cell carcinoma, NOS"	Alive	1791	s1235	0	0	Absence
74e47ded-2c00-4455-aaa6-cd662dfbf05e	TCGA-LP-A4AW-01A	5a55edd7-de3d-489c-a351-d21b47fc78b6	f8a9e7ad-4983-4f07-a804-03074075c4a4.rna_seq.augmented_star_gene_counts.tsv	Transcriptome profiling	Gene expression quantification	TCGA-CESC	TCGA-LP-A4AW	Primary tumor	"Squamous cell carcinoma, keratinizing, NOS"	Alive	27	s1440	0	0	Absence
753ee373-fbcf-4349-b9b2-5a41936e27e9	TCGA-EA-A3HS-01A	6866c9fe-da4f-40bb-a64a-cd14c01573a5	3100f712-2b8f-478c-88f6-a7d8bcdee829.rna_seq.augmented_star_gene_counts.tsv	Transcriptome profiling	Gene expression quantification	TCGA-CESC	TCGA-EA-A3HS	Primary tumor	"Squamous cell carcinoma, NOS"	Alive	959	s1222	0	0	Absence
75bc22d8-738d-45f8-b6c0-c664f5fef47c	TCGA-IR-A3LI-01A	f0882f2a-8cb7-4a5a-9a75-ed17babc9322	17b4c8c9-ff68-43cd-af95-eba0d20c1f5f.rna_seq.augmented_star_gene_counts.tsv	Transcriptome profiling	Gene expression quantification	TCGA-CESC	TCGA-IR-A3LI	Primary tumor	"Adenocarcinoma, endocervical type"	Alive	2493	s1585	0	0	Absence
76b54726-d348-4a1b-ae26-5b08d2effc9d	TCGA-EK-A2IP-01A	35f8d037-71a6-41fe-b9b4-09c5028785ff	0893b62f-b357-473b-a4d7-21b63369dd8c.rna_seq.augmented_star_gene_counts.tsv	Transcriptome profiling	Gene expression quantification	TCGA-CESC	TCGA-EK-A2IP	Primary tumor	"Squamous cell carcinoma, large cell, nonkeratinizing, NOS"	Alive	202	s1252	0	0	Absence
778389ba-c2e9-47d4-b133-6f4d0e689b34	TCGA-VS-A9V4-01A	666b9fe9-861b-495f-8df0-085eea717985	d01941dc-c222-49bc-8be9-11a405e48c6a.rna_seq.augmented_star_gene_counts.tsv	Transcriptome profiling	Gene expression quantification	TCGA-CESC	TCGA-VS-A9V4	Primary tumor	"Mucinous adenocarcinoma, endocervical type"	Dead	132	s1328	0	0	Absence
77d53d4d-3b07-4c79-86fe-6ac812968f39	TCGA-C5-A2M2-01A	4759a9a8-97e7-4e9d-9838-78fe7e5496ae	54f44f02-dd17-475e-bb5f-e051bb7acebf.rna_seq.augmented_star_gene_counts.tsv	Transcriptome profiling	Gene expression quantification	TCGA-CESC	TCGA-C5-A2M2	Primary tumor	"Adenocarcinoma, NOS"	Dead	1011	s1410	0	0	Absence
77da506b-e726-409f-b3eb-d41242862982	TCGA-MU-A51Y-01A	7448bab7-5712-46bf-a32a-eff7d56c2c84	bee207f8-0e5a-44e1-9b67-06d1882839d5.rna_seq.augmented_star_gene_counts.tsv	Transcriptome profiling	Gene expression quantification	TCGA-CESC	TCGA-MU-A51Y	Primary tumor	"Squamous cell carcinoma, large cell, nonkeratinizing, NOS"	Alive	854	s1571	0	0	Absence
785ddea1-399d-47d8-b2b0-39e95eaa24b5	TCGA-IR-A3LF-01A	6474a34c-0c47-4dc5-9fad-8a3bdd5d197d	65c46a4c-68b8-47fe-ae77-c6a4d134cb79.rna_seq.augmented_star_gene_counts.tsv	Transcriptome profiling	Gene expression quantification	TCGA-CESC	TCGA-IR-A3LF	Primary tumor	"Adenocarcinoma, endocervical type"	Alive	2949	s1258	0	0	Absence
78c62970-4b48-4dc4-9042-5f48f42818ec	TCGA-VS-A9UJ-01A	01b92eaa-fefc-476d-ae40-ecd3b8181e42	d0e0f248-d070-41c3-8172-aa6063422ecd.rna_seq.augmented_star_gene_counts.tsv	Transcriptome profiling	Gene expression quantification	TCGA-CESC	TCGA-VS-A9UJ	Primary tumor	"Squamous cell carcinoma, NOS"	Dead	52	s1603	303	0.342593	Presence
7941d1c7-5319-4e8d-a15f-60b61cb68a9b	TCGA-C5-A1BJ-01A	0ff314c9-c063-4057-92be-7e3ef9917c1f	82b84bdd-4978-4858-9594-1f511a053771.rna_seq.augmented_star_gene_counts.tsv	Transcriptome profiling	Gene expression quantification	TCGA-CESC	TCGA-C5-A1BJ	Primary tumor	"Squamous cell carcinoma, NOS"	Alive	4385	s1233	0	0	Absence
79ae5209-f476-4d65-a6c0-ebc18d7c8942	TCGA-EA-A78R-01A	a09e2659-22f7-44af-a919-4b32ec863fb7	51a1c9f7-ce64-4e72-a1e8-64d1be808a77.rna_seq.augmented_star_gene_counts.tsv	Transcriptome profiling	Gene expression quantification	TCGA-CESC	TCGA-EA-A78R	Primary tumor	"Squamous cell carcinoma, NOS"	Alive	410	s1580	0	0	Absence
7abaca8f-962e-4f9d-b63f-26c131bf5961	TCGA-VS-A9UL-01A	ffe362dc-e0e0-46ba-9e14-663cdebbcc2c	8ef17337-72e1-43bd-b668-a766469910f1.rna_seq.augmented_star_gene_counts.tsv	Transcriptome profiling	Gene expression quantification	TCGA-CESC	TCGA-VS-A9UL	Primary tumor	"Squamous cell carcinoma, NOS"	Dead	442	s1485	0	0	Absence
7b228c3b-e604-41a1-9b76-8dd3d5a59ffe	TCGA-VS-A8EI-01A	deff76a1-2751-4ef4-b2ed-66d579ed08cf	a9f6fbc2-d9b6-4272-82eb-665705d69ffd.rna_seq.augmented_star_gene_counts.tsv	Transcriptome profiling	Gene expression quantification	TCGA-CESC	TCGA-VS-A8EI	Primary tumor	"Squamous cell carcinoma, NOS"	Alive	729	s1590	0	0	Absence
7b356c12-b226-4e58-be7f-44e50e3eefbe	TCGA-EA-A410-01A	c7931f34-6744-42a5-8012-3b3ab7f5339c	39585364-6f4c-4b42-843f-ddca80061eb3.rna_seq.augmented_star_gene_counts.tsv	Transcriptome profiling	Gene expression quantification	TCGA-CESC	TCGA-EA-A410	Primary tumor	"Squamous cell carcinoma, NOS"	Alive	803	s1583	0	0	Absence
7b8c04d7-824d-493d-8f2c-9ed87a907192	TCGA-IR-A3LA-01A	f8c0f161-c4cb-4058-b2ec-5036339f8280	97141ff2-cce4-4df8-8944-819e6831ba80.rna_seq.augmented_star_gene_counts.tsv	Transcriptome profiling	Gene expression quantification	TCGA-CESC	TCGA-IR-A3LA	Primary tumor	"Adenocarcinoma, NOS"	Alive	4172	s1566	639	0.0379332	Presence
7c4ab1ca-4bdd-4ef7-9a42-f6c0c7136d26	TCGA-IR-A3LL-01A	b6e35e50-6604-4bf4-8b68-b2b328a47711	031644bc-299d-41f8-81fa-3c1f6f2356b8.rna_seq.augmented_star_gene_counts.tsv	Transcriptome profiling	Gene expression quantification	TCGA-CESC	TCGA-IR-A3LL	Primary tumor	"Squamous cell carcinoma, NOS"	Alive	1106	s1414	0	0	Absence
7c4cd55f-750e-4941-a9f3-0632a75d6531	TCGA-HM-A3JK-01A	9188ceae-a29e-4520-b8ab-12bcf2f9e4ca	7d5b4228-4095-4eca-825e-04cc7fa15164.rna_seq.augmented_star_gene_counts.tsv	Transcriptome profiling	Gene expression quantification	TCGA-CESC	TCGA-HM-A3JK	Primary tumor	"Squamous cell carcinoma, NOS"	Alive	632	s1584	0	0	Absence
7c93642d-7e05-40f8-b1ef-a014edcfba42	TCGA-DG-A2KJ-01A	4f6b0191-dc88-4bad-be2c-c228ef498ea8	c997840c-e608-4e24-8154-954b51d2bd0e.rna_seq.augmented_star_gene_counts.tsv	Transcriptome profiling	Gene expression quantification	TCGA-CESC	TCGA-DG-A2KJ	Primary tumor	"Squamous cell carcinoma, large cell, nonkeratinizing, NOS"	Alive	2893	s1582	1302	0.343135	Presence
7cc8f5bd-d2d3-44e9-aff6-fe9c9c805938	TCGA-JW-A852-01A	32290c26-b9b3-42b2-8c08-cd852b206e3b	d03cfd48-6ce0-4e88-880d-a0b3f67c5a62.rna_seq.augmented_star_gene_counts.tsv	Transcriptome profiling	Gene expression quantification	TCGA-CESC	TCGA-JW-A852	Primary tumor	"Squamous cell carcinoma, NOS"	Dead	252	s1294	0	0	Absence
7df6c297-f2d6-43ef-973b-1f95676b0cc4	TCGA-C5-A1BK-01B	20b8e8e2-6123-4167-8611-3bcbcaf9b43b	71c58545-f2f8-420e-bdc8-92a5d88e8ef8.rna_seq.augmented_star_gene_counts.tsv	Transcriptome profiling	Gene expression quantification	TCGA-CESC	TCGA-C5-A1BK	Primary tumor	"Squamous cell carcinoma, NOS"	Alive	5385	s1404	0	0	Absence
7fb8e7be-4118-41f8-b785-5cbb0afdb8b7	TCGA-C5-A1BM-01A	eb30f332-cb2d-4afe-bc27-e478d9978b58	3540cd31-424e-433b-9314-bcb3904cbb48.rna_seq.augmented_star_gene_counts.tsv	Transcriptome profiling	Gene expression quantification	TCGA-CESC	TCGA-C5-A1BM	Primary tumor	"Squamous cell carcinoma, NOS"	Dead	2520	s1232	0	0	Absence
81658ce6-d4a9-4ee0-ae8f-cf2fa8485701	TCGA-MA-AA41-01A	75841ff7-7f79-437d-9c8f-ce51f2cb16ca	f796b624-1011-4e51-9feb-8066602c72e0.rna_seq.augmented_star_gene_counts.tsv	Transcriptome profiling	Gene expression quantification	TCGA-CESC	TCGA-MA-AA41	Primary tumor	"Squamous cell carcinoma, NOS"	Alive	279	s1480	0	0	Absence
825a6fbb-aede-436f-800b-c7f096da0a77	TCGA-C5-A1M6-01A	dcf0174e-a94b-4bb7-9fcc-f9b224a5ce0b	f9ba2e2b-4d2b-4653-9270-fc99eaf2f37c.rna_seq.augmented_star_gene_counts.tsv	Transcriptome profiling	Gene expression quantification	TCGA-CESC	TCGA-C5-A1M6	Primary tumor	"Squamous cell carcinoma, NOS"	Dead	955	s1403	0	0	Absence
8328925e-3324-4188-85f1-6ffbf819d9e7	TCGA-C5-A7UH-01A	1f98cd0b-0d11-483b-a8b0-33a6291e4371	55a6f42b-cfb8-47ab-9048-e70708568099.rna_seq.augmented_star_gene_counts.tsv	Transcriptome profiling	Gene expression quantification	TCGA-CESC	TCGA-C5-A7UH	Primary tumor	"Squamous cell carcinoma, NOS"	Alive	3988	s1456	0	0	Absence
84cb84d0-7c7e-453c-8cc5-65b5af941028	TCGA-EA-A411-01A	10b16fba-8387-4c0d-a787-5c07bd235843	922087f0-f47f-4f91-aa30-c23b5afcce31.rna_seq.augmented_star_gene_counts.tsv	Transcriptome profiling	Gene expression quantification	TCGA-CESC	TCGA-EA-A411	Primary tumor	"Squamous cell carcinoma, NOS"	Alive	747	s1428	0	0	Absence
85abfd69-cf72-43f6-a7dd-97056f22c91b	TCGA-FU-A23K-01A	f259d4fc-45a7-4809-ac69-7443c52560bd	139f2229-3e0f-4cd9-b181-8cab30788bff.rna_seq.augmented_star_gene_counts.tsv	Transcriptome profiling	Gene expression quantification	TCGA-CESC	TCGA-FU-A23K	Primary tumor	Basaloid squamous cell carcinoma	Alive	372	s1248	0	0	Absence
86731af9-2d33-4521-9cf9-5f6152ca15d7	TCGA-FU-A23L-01A	0c2298c4-f6a4-4671-9a75-732c39f45122	46046da4-ae6b-4640-8b85-8cf8660ccaee.rna_seq.augmented_star_gene_counts.tsv	Transcriptome profiling	Gene expression quantification	TCGA-CESC	TCGA-FU-A23L	Primary tumor	"Squamous cell carcinoma, NOS"	Alive	725	s1421	0	0	Absence
87e701ab-acfd-45f2-a12e-323c94e5f3d5	TCGA-EA-A97N-01A	35d3b8c4-073c-46e1-90bf-3ab2d3f73c2d	f73e9c1b-1a89-4b7f-86fb-3677fbfec53f.rna_seq.augmented_star_gene_counts.tsv	Transcriptome profiling	Gene expression quantification	TCGA-CESC	TCGA-EA-A97N	Primary tumor	"Squamous cell carcinoma, NOS"	Alive	11	s1477	0	0	Absence
88f0aa4a-6bfd-4573-b136-58f84f867f10	TCGA-ZJ-AAXB-01A	2ff5425e-bedd-4097-afbd-157d0123bf7c	01630270-221d-44bf-93c9-5a971edcd476.rna_seq.augmented_star_gene_counts.tsv	Transcriptome profiling	Gene expression quantification	TCGA-CESC	TCGA-ZJ-AAXB	Primary tumor	"Adenocarcinoma, endocervical type"	Alive	0	s1488	0	0	Absence
8911c80c-c903-48e4-af5b-ffedef9abc47	TCGA-C5-A2M1-01A	8c954ffd-7f1a-4b77-85fa-b8721eb05f8b	35e5936c-9722-4a49-9bb3-5c244bd10b13.rna_seq.augmented_star_gene_counts.tsv	Transcriptome profiling	Gene expression quantification	TCGA-CESC	TCGA-C5-A2M1	Primary tumor	"Adenocarcinoma, endocervical type"	Alive	1169	s1260	0	0	Absence
8a4da4f0-30f2-497e-8a7c-988fd6b813cb	TCGA-C5-A1BN-01B	819b3175-21cb-4d77-8a8a-a3eef5b171d0	217a1b4c-4b7c-4d22-b737-b7a229812a97.rna_seq.augmented_star_gene_counts.tsv	Transcriptome profiling	Gene expression quantification	TCGA-CESC	TCGA-C5-A1BN	Primary tumor	"Squamous cell carcinoma, NOS"	Dead	166	s1388	0	0	Absence
8ac819b3-4227-4eae-be03-8760b197df9a	TCGA-C5-A8XK-01A	e726baa8-2647-4457-ba55-eace8cee3a5f	bea72e1c-de06-48ec-8e34-bd8bbf05a9ec.rna_seq.augmented_star_gene_counts.tsv	Transcriptome profiling	Gene expression quantification	TCGA-CESC	TCGA-C5-A8XK	Primary tumor	"Squamous cell carcinoma, NOS"	Alive	3039	s1467	0	0	Absence
8dbcb17d-0396-4faa-9b32-8e2566424bff	TCGA-DG-A2KK-01A	e56f80a9-63ca-4080-b89a-5627f8094a3b	ac912478-9989-498b-96d9-7d137dfed96a.rna_seq.augmented_star_gene_counts.tsv	Transcriptome profiling	Gene expression quantification	TCGA-CESC	TCGA-DG-A2KK	Primary tumor	"Squamous cell carcinoma, NOS"	Alive	2496	s1579	0	0	Absence
91310434-2a99-4e1d-81e6-3d58d097089f	TCGA-C5-A1BI-01B	8f0623d1-c21b-4669-9e3d-0a925e728733	62747279-612a-46c8-88db-60efed611f16.rna_seq.augmented_star_gene_counts.tsv	Transcriptome profiling	Gene expression quantification	TCGA-CESC	TCGA-C5-A1BI	Primary tumor	"Squamous cell carcinoma, NOS"	Alive	1112	s1236	234	0.0922444	Presence
929505f7-0270-475e-a9d6-00bf38dc78ba	TCGA-HM-A6W2-01A	546aacd6-00c6-4a7c-a02f-84ebd25ba776	0901705e-e9ed-4476-a99d-cfec76669d95.rna_seq.augmented_star_gene_counts.tsv	Transcriptome profiling	Gene expression quantification	TCGA-CESC	TCGA-HM-A6W2	Primary tumor	Adenosquamous carcinoma	Alive	287	s1588	0	0	Absence
939abca1-8bd0-4271-9a9b-666764eeb3b6	TCGA-VS-A9U5-01A	036c61d2-78a5-40fa-b0c3-1892affa379d	5b73ee15-ef19-423e-b576-6488ac16eb0c.rna_seq.augmented_star_gene_counts.tsv	Transcriptome profiling	Gene expression quantification	TCGA-CESC	TCGA-VS-A9U5	Primary tumor	"Squamous cell carcinoma, NOS"	Alive	1535	s1327	0	0	Absence
941f75a1-fea4-4539-ba69-60bb11608f6d	TCGA-C5-A1MI-01A	0d78f236-aa98-4841-8ab7-b8613a504516	f7afc2db-ce98-4501-9756-cb4e48cc9f10.rna_seq.augmented_star_gene_counts.tsv	Transcriptome profiling	Gene expression quantification	TCGA-CESC	TCGA-C5-A1MI	Primary tumor	"Squamous cell carcinoma, NOS"	Dead	1083	s1228	0	0	Absence
959fe574-054a-4fef-9cbe-a801a9a355de	TCGA-C5-A8XI-01A	870bb7aa-837d-4d6f-b919-e0077b0e090d	ecf98fc9-f07a-4f85-976b-ecee0bd25d95.rna_seq.augmented_star_gene_counts.tsv	Transcriptome profiling	Gene expression quantification	TCGA-CESC	TCGA-C5-A8XI	Primary tumor	"Squamous cell carcinoma, NOS"	Alive	254	s1598	0	0	Absence
968bd652-786c-4ddb-a937-dc480cb821fc	TCGA-FU-A57G-01A	e23d7e23-2028-49d5-9e91-1f84c3e366b6	f59df325-ffdd-45e3-89b5-f7848f42d622.rna_seq.augmented_star_gene_counts.tsv	Transcriptome profiling	Gene expression quantification	TCGA-CESC	TCGA-FU-A57G	Primary tumor	"Adenocarcinoma, endocervical type"	Alive	1078	s1263	0	0	Absence
970b619f-2eb5-4557-a7b8-5def35943c58	TCGA-EA-A1QT-01A	a1b31026-2dd3-4705-b0a1-f6acc84396a0	ec90d508-4c7f-4741-b8bd-6ef9dbff27e7.rna_seq.augmented_star_gene_counts.tsv	Transcriptome profiling	Gene expression quantification	TCGA-CESC	TCGA-EA-A1QT	Primary tumor	"Squamous cell carcinoma, large cell, nonkeratinizing, NOS"	Alive	1243	s1542	0	0	Absence
97cf3268-9756-4659-9e98-f200f96a91f4	TCGA-VS-A958-01A	3f612a01-f338-4b62-a47d-e4cd76090a23	374d16d2-73e2-45ad-aaaf-e7aee1197126.rna_seq.augmented_star_gene_counts.tsv	Transcriptome profiling	Gene expression quantification	TCGA-CESC	TCGA-VS-A958	Primary tumor	"Squamous cell carcinoma, large cell, nonkeratinizing, NOS"	Alive	1525	s1336	0	0	Absence
98784bbe-e286-48df-838d-1a88040658bf	TCGA-VS-A9U6-01A	35efcb1a-7458-4daa-a474-c8584396efb2	dd490d12-9e89-4432-a95a-b8739d10b2d2.rna_seq.augmented_star_gene_counts.tsv	Transcriptome profiling	Gene expression quantification	TCGA-CESC	TCGA-VS-A9U6	Primary tumor	"Squamous cell carcinoma, large cell, nonkeratinizing, NOS"	Alive	1320	s1500	0	0	Absence
9912432e-74bc-4846-93b4-fa2bf8070bd1	TCGA-EA-A3HU-01A	b6a1472b-926e-4e82-aa88-3c15a29acd25	f04eb02e-b62d-4796-98ea-cab8278f5088.rna_seq.augmented_star_gene_counts.tsv	Transcriptome profiling	Gene expression quantification	TCGA-CESC	TCGA-EA-A3HU	Primary tumor	"Squamous cell carcinoma, NOS"	Alive	1013	s1241	0	0	Absence
9aa36ac2-8418-4109-a3c1-63ca8742baab	TCGA-EK-A2RE-01A	b638e1a2-19a8-46ac-9d63-9a0f4d749e95	9e637ec3-375d-4691-af05-c49ea9b95505.rna_seq.augmented_star_gene_counts.tsv	Transcriptome profiling	Gene expression quantification	TCGA-CESC	TCGA-EK-A2RE	Primary tumor	"Squamous cell carcinoma, keratinizing, NOS"	Alive	57	s1405	0	0	Absence
9ba72a77-aef0-4788-8072-60c28902e55d	TCGA-VS-A954-01A	f1dec3d4-8e2e-4c69-aa18-c50288ac74ff	cbe8f2d4-c2e8-44a2-8c13-36834caf776e.rna_seq.augmented_star_gene_counts.tsv	Transcriptome profiling	Gene expression quantification	TCGA-CESC	TCGA-VS-A954	Primary tumor	"Squamous cell carcinoma, NOS"	Alive	1714	s1475	0	0	Absence
9c516d28-bef2-4334-bdda-97950bd95ac0	TCGA-VS-A9UI-01A	e6795001-8725-4e49-a5aa-6c21056bb682	98805dbd-41d9-4f88-85f6-37c9a67e045d.rna_seq.augmented_star_gene_counts.tsv	Transcriptome profiling	Gene expression quantification	TCGA-CESC	TCGA-VS-A9UI	Primary tumor	"Squamous cell carcinoma, NOS"	Dead	1372	s1491	0	0	Absence
9dba5a81-3587-4f5a-8d19-e0b0aed0a677	TCGA-FU-A5XV-01A	e59ba0fa-3627-48d5-94b4-13629f73dfb1	b8b73cb7-9946-4ef1-a9be-230c2e5121c4.rna_seq.augmented_star_gene_counts.tsv	Transcriptome profiling	Gene expression quantification	TCGA-CESC	TCGA-FU-A5XV	Primary tumor	"Squamous cell carcinoma, NOS"	Alive	321	s1432	0	0	Absence
9e2e29e8-d94a-499f-a98a-5b53b2c38f3b	TCGA-EA-A3QD-01A	ad78b087-f9f1-4f34-9712-b1214d22143d	ebfd0830-6b31-44db-8e34-a11504ec1e78.rna_seq.augmented_star_gene_counts.tsv	Transcriptome profiling	Gene expression quantification	TCGA-CESC	TCGA-EA-A3QD	Primary tumor	"Squamous cell carcinoma, NOS"	Alive	397	s1561	0	0	Absence
9e79059f-3453-4aa6-9849-55a267c711a4	TCGA-EA-A4BA-01A	e267ed77-4c8c-4e81-840a-d722bcfed788	d0f8273b-d232-43b1-91d3-c28b8dd43a72.rna_seq.augmented_star_gene_counts.tsv	Transcriptome profiling	Gene expression quantification	TCGA-CESC	TCGA-EA-A4BA	Primary tumor	"Adenocarcinoma, endocervical type"	Alive	755	s1430	876	0.384377	Presence
9fa42fe6-ccd0-4850-b08b-97b20eceb8df	TCGA-VS-A952-01A	cb7e396a-2f93-4ecc-a5e0-0584e05d2636	280f97b5-37aa-4ae5-9acb-d5c95ed61008.rna_seq.augmented_star_gene_counts.tsv	Transcriptome profiling	Gene expression quantification	TCGA-CESC	TCGA-VS-A952	Primary tumor	"Mucinous adenocarcinoma, endocervical type"	Alive	1778	s1599	0	0	Absence
a04cb81e-53bd-4686-9626-52ee87e3e261	TCGA-EK-A2IR-01A	023e0879-97cd-40c8-8d65-0d870808b1b1	dfadeb52-c6b5-432f-99bd-a71acaac39e7.rna_seq.augmented_star_gene_counts.tsv	Transcriptome profiling	Gene expression quantification	TCGA-CESC	TCGA-EK-A2IR	Primary tumor	"Squamous cell carcinoma, keratinizing, NOS"	Alive	3442	s1564	0	0	Absence
a0598331-79e1-418d-b50c-fd945b843506	TCGA-C5-A1ME-01A	375cb74d-1a6e-4c28-9918-3c32403605da	d1c86b8e-664a-40c0-b411-2b0e7b8f32ac.rna_seq.augmented_star_gene_counts.tsv	Transcriptome profiling	Gene expression quantification	TCGA-CESC	TCGA-C5-A1ME	Primary tumor	"Adenocarcinoma, NOS"	Alive	1756	s1545	141	0.0200466	Presence
a1b99260-8643-4cef-95a0-3853d64762b7	TCGA-VS-A9UY-01A	588ec075-13b8-48b8-be42-6dc4c1216403	4a538f24-c4bb-4775-af8f-16c099d0d780.rna_seq.augmented_star_gene_counts.tsv	Transcriptome profiling	Gene expression quantification	TCGA-CESC	TCGA-VS-A9UY	Primary tumor	"Squamous cell carcinoma, NOS"	Dead	555	s1322	0	0	Absence
a300db40-e0b8-4c45-abbd-d7aa06211e9c	TCGA-EA-A6QX-01A	c096566e-30e8-434a-a125-af0b4ffa689b	44259a78-f906-40f2-bfca-e4c1c9e676e1.rna_seq.augmented_star_gene_counts.tsv	Transcriptome profiling	Gene expression quantification	TCGA-CESC	TCGA-EA-A6QX	Primary tumor	"Squamous cell carcinoma, NOS"	Alive	730	s1293	0	0	Absence
a3be445a-a592-4073-815b-47ae41f9c4a0	TCGA-C5-A1M9-01A	92504fe3-2529-4849-96cc-ce9303ca3e6b	76171fe0-c056-431a-bbaa-9f1cc7f78fac.rna_seq.augmented_star_gene_counts.tsv	Transcriptome profiling	Gene expression quantification	TCGA-CESC	TCGA-C5-A1M9	Primary tumor	"Adenocarcinoma, NOS"	Dead	1065	s1392	0	0	Absence
a4e444b5-bbca-4ef0-b92f-908d608cbb91	TCGA-EA-A3QE-01A	376da420-c089-4cc6-aaeb-89be40733cb3	23541e74-44fe-4d60-a3b9-c4f09a685c35.rna_seq.augmented_star_gene_counts.tsv	Transcriptome profiling	Gene expression quantification	TCGA-CESC	TCGA-EA-A3QE	Primary tumor	"Squamous cell carcinoma, large cell, nonkeratinizing, NOS"	Alive	761	s1413	0	0	Absence
a4f13656-a941-498a-9ac9-f020ed559b35	TCGA-ZJ-AB0I-01A	84a8062a-50cc-4ac0-a638-e20ffc4981bc	13816c88-54eb-449c-97f9-6336c7d1ad8a.rna_seq.augmented_star_gene_counts.tsv	Transcriptome profiling	Gene expression quantification	TCGA-CESC	TCGA-ZJ-AB0I	Primary tumor	"Squamous cell carcinoma, keratinizing, NOS"	Alive	0	s1326	0	0	Absence
a5885835-9473-455a-bac0-6fa43fa8a866	TCGA-VS-A9V0-01A	a4933198-3dae-4fa7-a5a9-7b6df5b95c51	f37f2d34-cf48-41e4-89a5-3193ac34d7b3.rna_seq.augmented_star_gene_counts.tsv	Transcriptome profiling	Gene expression quantification	TCGA-CESC	TCGA-VS-A9V0	Primary tumor	"Mucinous adenocarcinoma, endocervical type"	Alive	573	s1496	0	0	Absence
a6a07bc7-ab1b-429d-81ed-d7a890c88e51	TCGA-VS-A9V1-01A	ef8ed1e1-7d71-4eab-90fe-d08421497cd6	e8cc844b-28c6-4fe8-8505-679a81afcffc.rna_seq.augmented_star_gene_counts.tsv	Transcriptome profiling	Gene expression quantification	TCGA-CESC	TCGA-VS-A9V1	Primary tumor	"Mucinous adenocarcinoma, endocervical type"	Dead	157	s1605	0	0	Absence
a945fd96-ffb3-4787-bacd-60da4560c8a5	TCGA-VS-A9UT-01A	df275ebc-48ed-48b8-a46f-30326cea3a58	af032dc7-51da-46c9-98af-733695b1ddf3.rna_seq.augmented_star_gene_counts.tsv	Transcriptome profiling	Gene expression quantification	TCGA-CESC	TCGA-VS-A9UT	Primary tumor	"Mucinous adenocarcinoma, endocervical type"	Alive	482	s1487	0	0	Absence
ac0ae100-8072-47cc-81d9-8b52b1bf9236	TCGA-EK-A2RC-01A	836dccc4-37fd-4e82-aaab-5bef56b1a457	0b37cded-430e-4480-8ebe-2a98b03209a7.rna_seq.augmented_star_gene_counts.tsv	Transcriptome profiling	Gene expression quantification	TCGA-CESC	TCGA-EK-A2RC	Primary tumor	"Squamous cell carcinoma, NOS"	Alive	129	s1554	0	0	Absence
acbfeb99-2b6b-4232-9ab5-a58549c6bc3a	TCGA-EK-A2RK-01A	dcd278c0-5dd7-4e39-81d4-6cd306b43ce7	a89bdf76-fb59-4e24-bbc2-f8a5b4f3efeb.rna_seq.augmented_star_gene_counts.tsv	Transcriptome profiling	Gene expression quantification	TCGA-CESC	TCGA-EK-A2RK	Primary tumor	"Squamous cell carcinoma, large cell, nonkeratinizing, NOS"	Alive	13	s1420	0	0	Absence
acf5cbf3-09ca-4f4d-a44e-1792613190fc	TCGA-JX-A5QV-01A	185e46cd-930e-4449-b473-a420e966d719	9e4cf258-cd85-4313-9324-a264e6ac7505.rna_seq.augmented_star_gene_counts.tsv	Transcriptome profiling	Gene expression quantification	TCGA-CESC	TCGA-JX-A5QV	Primary tumor	"Squamous cell carcinoma, keratinizing, NOS"	Alive	636	s1271	0	0	Absence
ada77320-fd05-4e43-be72-864391044b35	TCGA-EK-A2RA-01A	f8771769-2128-497a-b783-95f0c06a0bc8	4526c2ca-1737-45d7-8f4f-fc1b5576a708.rna_seq.augmented_star_gene_counts.tsv	Transcriptome profiling	Gene expression quantification	TCGA-CESC	TCGA-EK-A2RA	Primary tumor	"Squamous cell carcinoma, large cell, nonkeratinizing, NOS"	Alive	1246	s1427	0	0	Absence
adb7c5c8-4afd-40dc-89f1-571fbd88e4f9	TCGA-MA-AA3X-01A	c04d0019-e809-486e-a666-006b1d265163	9292715d-c827-469f-96a5-bae20326cae4.rna_seq.augmented_star_gene_counts.tsv	Transcriptome profiling	Gene expression quantification	TCGA-CESC	TCGA-MA-AA3X	Primary tumor	"Squamous cell carcinoma, NOS"	Alive	617	s1319	0	0	Absence
adc60720-ac20-4e73-9c37-3ad3119c07d6	TCGA-VS-A9UR-01A	41b80942-819c-49a9-8c01-2e804383f794	7437468e-a9c8-4cec-956f-860b25455c1f.rna_seq.augmented_star_gene_counts.tsv	Transcriptome profiling	Gene expression quantification	TCGA-CESC	TCGA-VS-A9UR	Primary tumor	"Mucinous adenocarcinoma, endocervical type"	Alive	793	s1330	0	0	Absence
aed93a3a-7dcb-4ba9-84c0-bc735cbd545f	TCGA-C5-A7X5-01A	4c2d4dfa-96ec-4db4-a3d0-84e1ce0609e8	e2d36200-e3a2-4b53-a233-63ec5977e79b.rna_seq.augmented_star_gene_counts.tsv	Transcriptome profiling	Gene expression quantification	TCGA-CESC	TCGA-C5-A7X5	Primary tumor	"Squamous cell carcinoma, keratinizing, NOS"	Dead	414	s1304	0	0	Absence
af33df2e-9737-4f63-952c-858a70aa589c	TCGA-ZJ-AAXD-01A	4fabd708-c3dd-4acc-8b6a-26557741bb6c	9c907e36-3f15-446f-b08a-0ecda33c5cc1.rna_seq.augmented_star_gene_counts.tsv	Transcriptome profiling	Gene expression quantification	TCGA-CESC	TCGA-ZJ-AAXD	Primary tumor	"Squamous cell carcinoma, large cell, nonkeratinizing, NOS"	Alive	0	s1490	105	0.195837	Presence
afb5442e-0249-475b-8f82-cae4e0268ad1	TCGA-VS-A8EC-01A	b097f7a8-15d0-44fc-8cee-3318a7267e47	c14446e4-1755-4b8d-a13d-1dfa816fa173.rna_seq.augmented_star_gene_counts.tsv	Transcriptome profiling	Gene expression quantification	TCGA-CESC	TCGA-VS-A8EC	Primary tumor	"Squamous cell carcinoma, NOS"	Alive	1415	s1472	0	0	Absence
b0b293c1-bd7e-4ba8-9f44-47398488ef2c	TCGA-VS-A8EG-01A	e01d595a-6a1d-465b-98da-ebafb1c9eb45	22dd8113-b0d5-4a63-830e-a75016b082a7.rna_seq.augmented_star_gene_counts.tsv	Transcriptome profiling	Gene expression quantification	TCGA-CESC	TCGA-VS-A8EG	Primary tumor	"Squamous cell carcinoma, NOS"	Alive	1386	s1305	0	0	Absence
b0f63819-fc86-4981-9d92-0115c6de3bce	TCGA-Q1-A73S-01A	a425bb3e-5207-4545-87cb-08a767fff8a1	7ca9bdb8-add3-4641-aa66-f0c2f16dfb64.rna_seq.augmented_star_gene_counts.tsv	Transcriptome profiling	Gene expression quantification	TCGA-CESC	TCGA-Q1-A73S	Primary tumor	Adenosquamous carcinoma	Alive	688	s1291	0	0	Absence
b12deb95-6aa1-49cb-a3c5-a711d42d6fb9	TCGA-ZJ-A8QQ-01A	69429e05-c102-4caa-837d-69cee85cc5fe	4fa7140b-6aab-42fe-a1a7-c336dee0b2d5.rna_seq.augmented_star_gene_counts.tsv	Transcriptome profiling	Gene expression quantification	TCGA-CESC	TCGA-ZJ-A8QQ	Primary tumor	"Squamous cell carcinoma, large cell, nonkeratinizing, NOS"	Alive	2056	s1306	0	0	Absence
b16469af-a721-43e9-a4d7-c39b94d1139f	TCGA-DS-A5RQ-01A	a9ee5a38-33af-4b10-be18-7aa273a3569d	d86f703e-eee4-43fb-a6be-fe1a0739e06f.rna_seq.augmented_star_gene_counts.tsv	Transcriptome profiling	Gene expression quantification	TCGA-CESC	TCGA-DS-A5RQ	Primary tumor	"Squamous cell carcinoma, NOS"	Alive	512	s1268	0	0	Absence
b5f0e361-d67d-4fa9-9916-43623dafb10f	TCGA-ZJ-AAX8-01A	97ec238d-88b4-4e12-9b04-dce8498b41b0	73fd6d31-0bd7-41db-8981-1d399e7a12d5.rna_seq.augmented_star_gene_counts.tsv	Transcriptome profiling	Gene expression quantification	TCGA-CESC	TCGA-ZJ-AAX8	Primary tumor	"Squamous cell carcinoma, large cell, nonkeratinizing, NOS"	Alive	0	s1608	0	0	Absence
b610d391-0c9d-4114-94d6-5e4aa4270122	TCGA-EK-A2RN-01A	56273cbf-9d87-4f96-a5a5-6886fc4ec48d	9926dee0-3563-4150-ac1b-76b8745a92a0.rna_seq.augmented_star_gene_counts.tsv	Transcriptome profiling	Gene expression quantification	TCGA-CESC	TCGA-EK-A2RN	Primary tumor	"Squamous cell carcinoma, keratinizing, NOS"	Alive	71	s1557	0	0	Absence
b726f18b-b996-4978-9f27-b3a540e06270	TCGA-C5-A1MK-01A	688cacb2-4475-4eef-91d8-80f61e6724d3	0bdaf8ce-5611-43fd-93c2-846005262e9d.rna_seq.augmented_star_gene_counts.tsv	Transcriptome profiling	Gene expression quantification	TCGA-CESC	TCGA-C5-A1MK	Primary tumor	"Squamous cell carcinoma, NOS"	Dead	74	s1390	0	0	Absence
b75644c2-b515-41ce-9b03-842ef5208a17	TCGA-FU-A3TX-01A	5f9d32b1-2776-4c17-ac6c-c187597e0084	7c2f3289-a4f2-4eaa-82d7-7ec55965eff7.rna_seq.augmented_star_gene_counts.tsv	Transcriptome profiling	Gene expression quantification	TCGA-CESC	TCGA-FU-A3TX	Primary tumor	"Squamous cell carcinoma, NOS"	Alive	45	s1419	0	0	Absence
b79558c5-1db2-4b1e-a7b8-efbd19aa855e	TCGA-IR-A3LK-01A	89d34cd7-a186-4bb7-9eeb-fe68fe24c70d	9d1d8d08-c99f-490a-a1cb-836710cf7f46.rna_seq.augmented_star_gene_counts.tsv	Transcriptome profiling	Gene expression quantification	TCGA-CESC	TCGA-IR-A3LK	Primary tumor	"Squamous cell carcinoma, NOS"	Dead	908	s1407	0	0	Absence
b7f2958f-256e-4c30-9c61-11e76ddb36ba	TCGA-FU-A3EO-01A	47254c42-77f0-4e52-b93a-60d421349b3c	1a72ff71-1c79-4ced-8e8d-f4e311c58efe.rna_seq.augmented_star_gene_counts.tsv	Transcriptome profiling	Gene expression quantification	TCGA-CESC	TCGA-FU-A3EO	Primary tumor	"Adenocarcinoma, NOS"	Alive	490	s1548	0	0	Absence
b82f4c6d-530f-4b0e-8f33-995633cb254a	TCGA-C5-A2LX-01A	a9d4d9c3-81ca-497e-bceb-b356d355f581	6b617184-1da0-4486-a5de-36ba39c15a2c.rna_seq.augmented_star_gene_counts.tsv	Transcriptome profiling	Gene expression quantification	TCGA-CESC	TCGA-C5-A2LX	Primary tumor	"Squamous cell carcinoma, NOS"	Alive	2526	s1255	0	0	Absence
b8eae533-2ad6-4dcf-98af-0fe7ff23a879	TCGA-DS-A1O9-01A	1f97ef15-61e1-40b7-86a3-ee5b18286905	293691f0-ce2c-4977-9e32-d96a2a5f2fc6.rna_seq.augmented_star_gene_counts.tsv	Transcriptome profiling	Gene expression quantification	TCGA-CESC	TCGA-DS-A1O9	Primary tumor	"Squamous cell carcinoma, NOS"	Dead	266	s1229	0	0	Absence
bae2af5e-484a-44f7-ad6b-66137cdae300	TCGA-C5-A7CL-01A	b004be4a-ab45-4016-a4b3-95506f7eaff7	e57d8ec9-b673-4dbc-b129-e491aa772cd0.rna_seq.augmented_star_gene_counts.tsv	Transcriptome profiling	Gene expression quantification	TCGA-CESC	TCGA-C5-A7CL	Primary tumor	"Squamous cell carcinoma, NOS"	Dead	471	s1581	0	0	Absence
bbb96b5a-80e8-4542-80b4-2444cf1fe51e	TCGA-JW-A5VK-01A	8583fa2b-2a63-444d-9dbf-caff84ba40a6	8a85eecd-ce5f-40bb-a95a-534abbdc99c5.rna_seq.augmented_star_gene_counts.tsv	Transcriptome profiling	Gene expression quantification	TCGA-CESC	TCGA-JW-A5VK	Primary tumor	Papillary squamous cell carcinoma	Alive	623	s1575	0	0	Absence
bc2003b9-d489-4559-8672-d9fd2d82f2e8	TCGA-MA-AA3Z-01A	982b668c-b33f-4d8c-8efa-4755cd680c17	8b69ec22-ac53-46b1-b3ef-53fd8ca6b0ab.rna_seq.augmented_star_gene_counts.tsv	Transcriptome profiling	Gene expression quantification	TCGA-CESC	TCGA-MA-AA3Z	Primary tumor	"Squamous cell carcinoma, NOS"	Alive	595	s1311	0	0	Absence
bc63dd2a-b8f6-4b30-a8d7-ce193bcd17f1	TCGA-C5-A3HE-01A	78370df1-5e20-47f6-b3e2-f2782860481a	a3141783-b33c-4f05-854f-229855fb10ad.rna_seq.augmented_star_gene_counts.tsv	Transcriptome profiling	Gene expression quantification	TCGA-CESC	TCGA-C5-A3HE	Primary tumor	"Squamous cell carcinoma, NOS"	Alive	548	s1565	0	0	Absence
bdad2f13-ede2-4aad-91a4-bf60f8888bf2	TCGA-RA-A741-01A	bba0933b-5775-4fbc-93dc-9b31f743fbf2	e2916476-526f-4744-964a-fea6dc549669.rna_seq.augmented_star_gene_counts.tsv	Transcriptome profiling	Gene expression quantification	TCGA-CESC	TCGA-RA-A741	Primary tumor	"Squamous cell carcinoma, NOS"	Alive	444	s1289	0	0	Absence
be8b1c78-8cb1-4bff-b1fe-71ecdc454c94	TCGA-C5-A8YR-01A	1f6fdb5a-beaa-4f9b-b08e-678b839cc4cd	bff7c60a-0b31-48db-8ec6-32860b5756ee.rna_seq.augmented_star_gene_counts.tsv	Transcriptome profiling	Gene expression quantification	TCGA-CESC	TCGA-C5-A8YR	Primary tumor	"Squamous cell carcinoma, large cell, nonkeratinizing, NOS"	Dead	837	s1297	0	0	Absence
be8fa67d-c2d3-4fff-82fe-a46ba1fa8df0	TCGA-C5-A2LZ-01A	6b3b607a-8549-442e-acb4-3cb156e72266	850186c5-6126-4dde-b8c4-d3e947f0aa1a.rna_seq.augmented_star_gene_counts.tsv	Transcriptome profiling	Gene expression quantification	TCGA-CESC	TCGA-C5-A2LZ	Primary tumor	"Squamous cell carcinoma, NOS"	Dead	3046	s1237	0	0	Absence
bfd82578-8b60-4c23-85a1-fc14a1cf5f12	TCGA-EK-A2PI-01A	cc30f610-b95a-4a38-8b16-31ff7bff70b1	b137e7bb-cf10-4926-a222-24213322bba0.rna_seq.augmented_star_gene_counts.tsv	Transcriptome profiling	Gene expression quantification	TCGA-CESC	TCGA-EK-A2PI	Primary tumor	"Squamous cell carcinoma, large cell, nonkeratinizing, NOS"	Alive	586	s1409	345	0.0154081	Presence
c13215d9-26a8-4c8b-b4fe-5da6aa3222af	TCGA-EK-A2RM-01A	3ab4acdb-a285-4c74-a951-29bd16d82051	34fae81f-2165-4b05-a48f-386b7547e665.rna_seq.augmented_star_gene_counts.tsv	Transcriptome profiling	Gene expression quantification	TCGA-CESC	TCGA-EK-A2RM	Primary tumor	"Squamous cell carcinoma, NOS"	Alive	50	s1547	114	0.0411545	Presence
c14468eb-e725-4029-96cc-75bb9ebd9def	TCGA-DS-A7WI-01A	1826bb79-f078-4934-b1d7-83d1051d7029	2cd0d7ad-d9ff-48d2-b777-4bbd7d72fee9.rna_seq.augmented_star_gene_counts.tsv	Transcriptome profiling	Gene expression quantification	TCGA-CESC	TCGA-DS-A7WI	Primary tumor	"Squamous cell carcinoma, large cell, nonkeratinizing, NOS"	Dead	252	s1452	0	0	Absence
c4f61715-ee58-4799-a5f4-0f5e27c4093d	TCGA-VS-A8QH-01A	33bcfac2-da3b-4345-9184-097dcc5b115c	8406dd78-4357-4837-be0d-a4982b5ef157.rna_seq.augmented_star_gene_counts.tsv	Transcriptome profiling	Gene expression quantification	TCGA-CESC	TCGA-VS-A8QH	Primary tumor	"Mucinous adenocarcinoma, endocervical type"	Dead	1210	s1459	0	0	Absence
c659f1c9-f3b4-4cfe-8627-2bb716c62b96	TCGA-UC-A7PI-01A	9258f875-ec56-4e91-8482-770132969d08	d11296ea-f118-45da-bdd0-858a0b84e082.rna_seq.augmented_star_gene_counts.tsv	Transcriptome profiling	Gene expression quantification	TCGA-CESC	TCGA-UC-A7PI	Primary tumor	"Adenocarcinoma, NOS"	Alive	2114	s1320	0	0	Absence
c80f777e-d150-40f3-9fa9-02ef9a6d7692	TCGA-Q1-A6DV-01A	43eca33b-5eb8-40e5-91a1-a7364b694f36	d1161c1c-a87f-4c08-8c98-554d7411655e.rna_seq.augmented_star_gene_counts.tsv	Transcriptome profiling	Gene expression quantification	TCGA-CESC	TCGA-Q1-A6DV	Primary tumor	"Mucinous adenocarcinoma, endocervical type"	Alive	491	s1281	0	0	Absence
c83c52f4-3815-4f49-8218-cf80aaa62e2f	TCGA-EK-A2H0-01A	626db5b0-7cbc-4784-aeaf-ff7a961d581f	4087b06c-8a7f-4702-9c82-2c778dacf969.rna_seq.augmented_star_gene_counts.tsv	Transcriptome profiling	Gene expression quantification	TCGA-CESC	TCGA-EK-A2H0	Primary tumor	"Squamous cell carcinoma, keratinizing, NOS"	Alive	1847	s1563	0	0	Absence
c92696ba-f549-480d-8d4a-5f23b27aa336	TCGA-C5-A907-01A	49a5993e-2878-45ea-bdcd-c746d2abfce5	15a570d6-635f-4e37-9204-7c5a3c604e65.rna_seq.augmented_star_gene_counts.tsv	Transcriptome profiling	Gene expression quantification	TCGA-CESC	TCGA-C5-A907	Primary tumor	"Squamous cell carcinoma, NOS"	Alive	448	s1462	159	0.114001	Presence
c996cffb-8132-4973-987d-143274b6a081	TCGA-EK-A2RO-01A	4152f8d0-f0ce-41ac-835c-a04b8bb838d0	51c6de4a-42a1-452d-9b9b-37075db86111.rna_seq.augmented_star_gene_counts.tsv	Transcriptome profiling	Gene expression quantification	TCGA-CESC	TCGA-EK-A2RO	Primary tumor	"Squamous cell carcinoma, large cell, nonkeratinizing, NOS"	Alive	2	s1257	0	0	Absence
c99f476b-e8b1-4cdd-9164-0da450064886	TCGA-C5-A905-01A	16b7508c-e33b-4c79-82f7-148736027150	fee6f89e-813f-452b-9c04-48fede0ef6fd.rna_seq.augmented_star_gene_counts.tsv	Transcriptome profiling	Gene expression quantification	TCGA-CESC	TCGA-C5-A905	Primary tumor	"Squamous cell carcinoma, NOS"	Alive	4879	s1466	0	0	Absence
c9e4bac6-0cac-4fca-a548-527deac5b880	TCGA-VS-A9UV-01A	41216940-5c07-4025-add6-9ba845e87909	664ab536-b2a9-4262-95e2-709103bf9534.rna_seq.augmented_star_gene_counts.tsv	Transcriptome profiling	Gene expression quantification	TCGA-CESC	TCGA-VS-A9UV	Primary tumor	"Squamous cell carcinoma, NOS"	Dead	104	s1484	0	0	Absence
c9f519b6-73f1-4737-83cb-f5ef208592cd	TCGA-MY-A913-01A	c8844800-f7cc-4d32-a7c9-9095bdaf9c32	2c7e58ed-0853-480f-a2d0-5aa6ee94b639.rna_seq.augmented_star_gene_counts.tsv	Transcriptome profiling	Gene expression quantification	TCGA-CESC	TCGA-MY-A913	Primary tumor	"Squamous cell carcinoma, NOS"	Alive	524	s1463	0	0	Absence
ca242b4c-b879-4e13-a1e7-84c984067189	TCGA-VS-A9UB-01A	8d2820c9-56a4-48c5-97b8-bed062891a2a	b59396c9-4dfa-47b3-840c-b81621c95995.rna_seq.augmented_star_gene_counts.tsv	Transcriptome profiling	Gene expression quantification	TCGA-CESC	TCGA-VS-A9UB	Primary tumor	"Squamous cell carcinoma, NOS"	Alive	911	s1334	0	0	Absence
cb31b3ce-8595-4d75-9436-bb59e95c3a19	TCGA-VS-A957-01A	6c63e461-a0c9-4b7c-9dba-91ccd7a52116	13681013-029b-49d8-a42a-2e914d4bf610.rna_seq.augmented_star_gene_counts.tsv	Transcriptome profiling	Gene expression quantification	TCGA-CESC	TCGA-VS-A957	Primary tumor	"Squamous cell carcinoma, NOS"	Alive	1688	s1609	0	0	Absence
cb695fdd-381e-4c00-836e-0ba27e32176b	TCGA-VS-A8QC-01A	4cbb05ab-42c4-4b17-b2b9-de84a3642992	2fabaf9c-60a8-4143-ad83-dd35f6efc9e2.rna_seq.augmented_star_gene_counts.tsv	Transcriptome profiling	Gene expression quantification	TCGA-CESC	TCGA-VS-A8QC	Primary tumor	"Squamous cell carcinoma, NOS"	Dead	350	s1597	0	0	Absence
cb780c10-8810-4384-b829-954aab1c16c8	TCGA-EK-A3GM-01A	dbbb07a8-2201-4875-a302-8a0e34bf3575	aefbd8c3-e755-4dd4-aba7-78eab7fcb4cb.rna_seq.augmented_star_gene_counts.tsv	Transcriptome profiling	Gene expression quantification	TCGA-CESC	TCGA-EK-A3GM	Primary tumor	"Adenocarcinoma, endocervical type"	Alive	0	s1415	0	0	Absence
cca23650-1b06-4977-91e8-f35e73e70c48	TCGA-VS-A9UC-01A	813302dc-5bb7-47aa-8319-f86c00b6f9b9	3e0efd6a-312d-400c-bcef-90202dcbe402.rna_seq.augmented_star_gene_counts.tsv	Transcriptome profiling	Gene expression quantification	TCGA-CESC	TCGA-VS-A9UC	Primary tumor	"Squamous cell carcinoma, NOS"	Alive	825	s1497	0	0	Absence
ccd569e9-dcbe-4280-8c21-6bfe4ce60d7a	TCGA-EK-A2RJ-01A	e7029a85-afe7-4f49-b61d-86aa6225b980	8ad8a424-e51f-4421-b02d-4e4402985f49.rna_seq.augmented_star_gene_counts.tsv	Transcriptome profiling	Gene expression quantification	TCGA-CESC	TCGA-EK-A2RJ	Primary tumor	"Squamous cell carcinoma, NOS"	Alive	53	s1259	0	0	Absence
ce5765fb-5221-4cbf-aa76-bb863803df57	TCGA-C5-A7UI-01A	98be97ab-dc02-4566-8055-ba2e295d7eeb	d09f31a2-752d-4241-a3bc-4faa2ca85d8a.rna_seq.augmented_star_gene_counts.tsv	Transcriptome profiling	Gene expression quantification	TCGA-CESC	TCGA-C5-A7UI	Primary tumor	"Squamous cell carcinoma, large cell, nonkeratinizing, NOS"	Dead	2888	s1307	0	0	Absence
cecaecb4-51ef-407d-a882-0e4b444b0a77	TCGA-C5-A8YT-01A	c4f5a5c0-885c-4dd4-9f61-e05c1d439e74	f16f8594-3ad7-4eb3-b039-b5f156d3a3c0.rna_seq.augmented_star_gene_counts.tsv	Transcriptome profiling	Gene expression quantification	TCGA-CESC	TCGA-C5-A8YT	Primary tumor	"Squamous cell carcinoma, NOS"	Dead	633	s1464	0	0	Absence
cef2efb2-93cc-4bdf-a343-9965e7e0432c	TCGA-MY-A5BD-01A	d8af3627-5eb7-4656-8152-7488bc2c83de	df984661-23c4-4aab-bc46-c79ee677bbe3.rna_seq.augmented_star_gene_counts.tsv	Transcriptome profiling	Gene expression quantification	TCGA-CESC	TCGA-MY-A5BD	Primary tumor	"Squamous cell carcinoma, NOS"	Alive	1667	s1267	0	0	Absence
cfb61fd8-0bca-40b4-878c-cc914a289792	TCGA-EA-A44S-01A	fb87474d-caa9-4ec2-96ba-4ea9d44d115f	ba8d0266-8e93-4ce3-9a24-0188ec829ce3.rna_seq.augmented_star_gene_counts.tsv	Transcriptome profiling	Gene expression quantification	TCGA-CESC	TCGA-EA-A44S	Primary tumor	"Squamous cell carcinoma, NOS"	Alive	369	s1572	0	0	Absence
d02ffaa9-0403-4a89-be01-cce35c80dd69	TCGA-DS-A7WF-01A	5b7b17dd-74a9-467a-bcc8-4403327da45f	2539187f-6898-4e7c-ab83-4ea32d55e036.rna_seq.augmented_star_gene_counts.tsv	Transcriptome profiling	Gene expression quantification	TCGA-CESC	TCGA-DS-A7WF	Primary tumor	Adenosquamous carcinoma	Dead	492	s1455	0	0	Absence
d07d0a56-a25e-426b-8384-9d49e6545527	TCGA-EK-A3GK-01A	9061ba27-abbc-46ab-b785-f7e3d8740cfa	20e72530-f9cc-44d6-81f9-bb7c49f1f7e4.rna_seq.augmented_star_gene_counts.tsv	Transcriptome profiling	Gene expression quantification	TCGA-CESC	TCGA-EK-A3GK	Primary tumor	"Adenocarcinoma, endocervical type"	Alive	15	s1245	0	0	Absence
d0cbe668-5c95-4261-a1e8-cef55093a0f7	TCGA-Q1-A73O-01A	9394076a-cc15-4269-817a-2fd1c91e3c8c	3d21ca63-5295-4ed3-8e2d-7fd93193090a.rna_seq.augmented_star_gene_counts.tsv	Transcriptome profiling	Gene expression quantification	TCGA-CESC	TCGA-Q1-A73O	Primary tumor	"Squamous cell carcinoma, large cell, nonkeratinizing, NOS"	Alive	428	s1443	0	0	Absence
d1a5b028-ec79-456b-81a1-69838e2922df	TCGA-JW-A5VL-01A	3a823986-e570-4ff2-849f-4087489e869c	d4d27b5d-8d30-4c77-8ffc-8965ca4c5d3e.rna_seq.augmented_star_gene_counts.tsv	Transcriptome profiling	Gene expression quantification	TCGA-CESC	TCGA-JW-A5VL	Primary tumor	"Squamous cell carcinoma, NOS"	Alive	474	s1438	0	0	Absence
d223ff09-b80b-4368-9d80-a59dfbe4d820	TCGA-C5-A7CM-01A	14086390-e478-4fb5-ab36-e971815b182b	8d405837-5989-4de9-a19c-4f7af4af65d3.rna_seq.augmented_star_gene_counts.tsv	Transcriptome profiling	Gene expression quantification	TCGA-CESC	TCGA-C5-A7CM	Primary tumor	"Adenocarcinoma, endocervical type"	Alive	619	s1290	0	0	Absence
d3ff2aeb-46be-4f54-8a8f-178eb921fbb6	TCGA-VS-A9V5-01A	356da03a-5cac-4fce-babf-4a5c2add7b3e	4da5219c-0ba3-4f2a-beaf-83608a3c6df5.rna_seq.augmented_star_gene_counts.tsv	Transcriptome profiling	Gene expression quantification	TCGA-CESC	TCGA-VS-A9V5	Primary tumor	"Mucinous adenocarcinoma, endocervical type"	Dead	494	s1483	0	0	Absence
d4510801-8ce4-4f10-8b31-25c0a39b5135	TCGA-EK-A2R8-01A	fff8886a-3620-4bac-815a-d1815dcce9fb	34e0bfb9-481c-4dde-9cfc-f5b1bacaae76.rna_seq.augmented_star_gene_counts.tsv	Transcriptome profiling	Gene expression quantification	TCGA-CESC	TCGA-EK-A2R8	Primary tumor	"Squamous cell carcinoma, large cell, nonkeratinizing, NOS"	Alive	44	s1386	267	0.0805248	Presence
d5d8a818-d689-4c6f-96b0-13f2cb10c3ca	TCGA-FU-A2QG-01A	4d15a2c6-a958-4496-baa2-575acd3ac402	623cdf95-e7ed-4a7a-9af8-54aef17a2475.rna_seq.augmented_star_gene_counts.tsv	Transcriptome profiling	Gene expression quantification	TCGA-CESC	TCGA-FU-A2QG	Primary tumor	"Squamous cell carcinoma, keratinizing, NOS"	Alive	579	s1254	0	0	Absence
d626a732-af64-4dec-b4bf-3cb761bf4c8d	TCGA-C5-A7CH-01A	eace2f79-bfc7-48cf-8e92-b60389df9be2	7c786c3a-fb45-459f-b1ca-993bb2b86abd.rna_seq.augmented_star_gene_counts.tsv	Transcriptome profiling	Gene expression quantification	TCGA-CESC	TCGA-C5-A7CH	Primary tumor	"Squamous cell carcinoma, NOS"	Alive	4694	s1587	0	0	Absence
d7a75bf5-5189-4978-99d9-fcef91c9fbd2	TCGA-EK-A2R7-01A	d3206077-ffc4-4f93-b7d9-8a1652178232	7cec3da4-00ff-412d-aff2-676839872124.rna_seq.augmented_star_gene_counts.tsv	Transcriptome profiling	Gene expression quantification	TCGA-CESC	TCGA-EK-A2R7	Primary tumor	"Squamous cell carcinoma, large cell, nonkeratinizing, NOS"	Alive	27	s1385	0	0	Absence
d7f07485-522a-49d9-b105-5a9a51aca8f7	TCGA-EK-A2GZ-01A	3afc6fee-22bb-418c-ae3a-bd21bd4e5201	891f3a70-63c9-4c56-918e-a3053cd848dc.rna_seq.augmented_star_gene_counts.tsv	Transcriptome profiling	Gene expression quantification	TCGA-CESC	TCGA-EK-A2GZ	Primary tumor	"Squamous cell carcinoma, NOS"	Alive	383	s1249	0	0	Absence
d9b0ac5a-811d-4305-bb1c-a965bd389ce4	TCGA-Q1-A73R-01A	becb2adb-be99-45f3-8b5d-a53f1c4520c5	28ea2e3f-fecf-481f-a3bc-ac4ae9ae40b4.rna_seq.augmented_star_gene_counts.tsv	Transcriptome profiling	Gene expression quantification	TCGA-CESC	TCGA-Q1-A73R	Primary tumor	"Adenocarcinoma, endocervical type"	Alive	567	s1292	0	0	Absence
d9c2ca21-f1a6-4cf4-be28-6c2492dd38e5	TCGA-VS-A8EK-01A	d53e7cf3-5456-4ca2-b321-a2ad07e3e2b0	20c5cd5b-fb12-4d41-9b3c-056737b0bd79.rna_seq.augmented_star_gene_counts.tsv	Transcriptome profiling	Gene expression quantification	TCGA-CESC	TCGA-VS-A8EK	Primary tumor	"Squamous cell carcinoma, NOS"	Dead	829	s1465	0	0	Absence
da30a845-c4d3-4c78-b8b0-210239224f8f	TCGA-C5-A7UE-01A	9f23e23f-826e-4e0e-995d-d8fc78f3a823	2cf3adde-84fd-4576-b04b-6e0a3d02cef2.rna_seq.augmented_star_gene_counts.tsv	Transcriptome profiling	Gene expression quantification	TCGA-CESC	TCGA-C5-A7UE	Primary tumor	"Squamous cell carcinoma, NOS"	Alive	4738	s1449	0	0	Absence
da5fcb99-16b4-4f9e-8602-d6a6192875ef	TCGA-MA-AA42-01A	4de066fe-652a-4b78-9649-c5c76efb90fe	b67515a0-9131-43ea-82a4-8e051fd7cfa9.rna_seq.augmented_star_gene_counts.tsv	Transcriptome profiling	Gene expression quantification	TCGA-CESC	TCGA-MA-AA42	Primary tumor	"Squamous cell carcinoma, NOS"	Alive	259	s1317	0	0	Absence
da901e97-3a1d-4952-8254-9c4e60d2812c	TCGA-VS-A953-01A	c574af77-8962-4390-8e42-ef7cbb76dafb	6d1b45f0-346d-4703-86be-9f91f8d86bbd.rna_seq.augmented_star_gene_counts.tsv	Transcriptome profiling	Gene expression quantification	TCGA-CESC	TCGA-VS-A953	Primary tumor	"Squamous cell carcinoma, NOS"	Dead	477	s1312	0	0	Absence
dac27c24-cdbf-4527-9214-178fde3d098a	TCGA-FU-A3NI-01A	14c844b0-45a6-4a4d-966b-8d1a99e2732f	2f3978c7-dd61-4efb-a870-01c1105fbd63.rna_seq.augmented_star_gene_counts.tsv	Transcriptome profiling	Gene expression quantification	TCGA-CESC	TCGA-FU-A3NI	Primary tumor	"Squamous cell carcinoma, keratinizing, NOS"	Dead	638	s1559	0	0	Absence
dadcf6d5-03eb-4090-bcc3-b9e9dc3c7e08	TCGA-DS-A7WH-01A	a5dab9ee-826f-48b0-8041-c53d8d9626a5	1ca18034-de13-47ef-af28-eef14baa1d1a.rna_seq.augmented_star_gene_counts.tsv	Transcriptome profiling	Gene expression quantification	TCGA-CESC	TCGA-DS-A7WH	Primary tumor	"Mucinous adenocarcinoma, endocervical type"	Alive	533	s1453	0	0	Absence
db44488e-4ed0-4082-bca0-bbfd22ff0537	TCGA-ZJ-A8QR-01A	94b9350c-154c-48ff-9b13-883d11fee63a	8d86a9c9-df22-41d4-80a2-fca983941724.rna_seq.augmented_star_gene_counts.tsv	Transcriptome profiling	Gene expression quantification	TCGA-CESC	TCGA-ZJ-A8QR	Primary tumor	"Squamous cell carcinoma, keratinizing, NOS"	Dead	582	s1471	0	0	Absence
ddd4b6d2-5be0-4edd-977a-a795eea3c738	TCGA-ZJ-AAXU-01A	69cf186a-3006-4d3d-a8b1-70b402da0a65	6c45da2d-3b63-41a5-861f-f14040f03686.rna_seq.augmented_star_gene_counts.tsv	Transcriptome profiling	Gene expression quantification	TCGA-CESC	TCGA-ZJ-AAXU	Primary tumor	"Squamous cell carcinoma, large cell, nonkeratinizing, NOS"	Alive	5	s1337	132	0.0832293	Presence
de3cfb81-25c3-4137-8f24-ad8aa607c158	TCGA-C5-A8YQ-01A	3f237865-cbba-4be3-9c08-c37fa12771cd	5f75e4e9-89f0-49e4-9349-44f9a33ff7cd.rna_seq.augmented_star_gene_counts.tsv	Transcriptome profiling	Gene expression quantification	TCGA-CESC	TCGA-C5-A8YQ	Primary tumor	"Squamous cell carcinoma, NOS"	Dead	715	s1301	420	0.0418977	Presence
deda68dd-e9ad-45cc-9dbb-1c5836ef6519	TCGA-EK-A3GJ-01A	b3ac604f-f7e3-4349-b08d-c90e04c9a0fb	c766524b-c372-49bb-b82d-c48790f82323.rna_seq.augmented_star_gene_counts.tsv	Transcriptome profiling	Gene expression quantification	TCGA-CESC	TCGA-EK-A3GJ	Primary tumor	"Squamous cell carcinoma, keratinizing, NOS"	Alive	3	s1397	0	0	Absence
dedfd5fb-3c72-40f9-a7ef-52c2176bf662	TCGA-C5-A7XC-01A	c1c7ecf9-55b8-4f6c-ae9b-b176ef304cf9	a000eaa7-3dd5-45c0-9e28-17cda7144f2c.rna_seq.augmented_star_gene_counts.tsv	Transcriptome profiling	Gene expression quantification	TCGA-CESC	TCGA-C5-A7XC	Primary tumor	"Squamous cell carcinoma, NOS"	Alive	1551	s1478	0	0	Absence
dfd30f94-19e3-4838-95df-14a3763419af	TCGA-DS-A0VL-01A	05a80b4d-cfbd-4bab-83d2-bb3261832cd3	d22fd61e-356e-4e3e-a507-dcb7ee09b1f2.rna_seq.augmented_star_gene_counts.tsv	Transcriptome profiling	Gene expression quantification	TCGA-CESC	TCGA-DS-A0VL	Primary tumor	"Squamous cell carcinoma, NOS"	Dead	1692	s1556	0	0	Absence
e0a5d99b-b58b-4301-b2dc-a767d90059b1	TCGA-VS-A8EL-01A	30ce352f-e70d-4256-b7c6-bd26f266b4c8	cf513d05-11ff-4a34-9317-896bd2a4ff83.rna_seq.augmented_star_gene_counts.tsv	Transcriptome profiling	Gene expression quantification	TCGA-CESC	TCGA-VS-A8EL	Primary tumor	"Squamous cell carcinoma, NOS"	Alive	1992	s1300	426	0.0179544	Presence
e15d92a1-6925-4b58-a494-d6f665f67b83	TCGA-LP-A4AU-01A	c36b4e92-fd9e-4a36-a56c-fc0b292f9210	bb0fc611-813e-4b9f-a014-2107117302d6.rna_seq.augmented_star_gene_counts.tsv	Transcriptome profiling	Gene expression quantification	TCGA-CESC	TCGA-LP-A4AU	Primary tumor	"Squamous cell carcinoma, NOS"	Alive	343	s1286	0	0	Absence
e2ff7cfd-a101-45b9-895f-26f403e7bdfb	TCGA-HG-A2PA-01A	b763b448-99e8-4a99-9c1e-b5204d06ad8d	3cdc6f45-7fd2-46d2-81de-7f8c8459b591.rna_seq.augmented_star_gene_counts.tsv	Transcriptome profiling	Gene expression quantification	TCGA-CESC	TCGA-HG-A2PA	Primary tumor	"Squamous cell carcinoma, NOS"	Dead	773	s1221	0	0	Absence
e711b88e-fa0e-4781-8549-7a53ed3a13a1	TCGA-DS-A1OC-01A	c809507f-c91d-43a1-97ea-f29846c3b639	373d522b-0c66-40fa-a888-12eb86624ce4.rna_seq.augmented_star_gene_counts.tsv	Transcriptome profiling	Gene expression quantification	TCGA-CESC	TCGA-DS-A1OC	Primary tumor	"Squamous cell carcinoma, NOS"	Alive	376	s1391	0	0	Absence
e733f289-a0ec-478c-aad9-1378ad26ddfa	TCGA-C5-A2LY-01A	170d112d-c64e-4325-9397-a8f942faac6d	f30b81aa-a8e9-4bcd-9dae-a02ea90f33e8.rna_seq.augmented_star_gene_counts.tsv	Transcriptome profiling	Gene expression quantification	TCGA-CESC	TCGA-C5-A2LY	Primary tumor	"Squamous cell carcinoma, NOS"	Alive	2383	s1383	0	0	Absence
e77c3f70-08d1-40d3-b038-f09a519423cc	TCGA-C5-A1BQ-01C	2e1f60b8-b3de-478f-a6c2-543907c8e18b	48852575-9f44-420b-9ce2-919d97905a0b.rna_seq.augmented_star_gene_counts.tsv	Transcriptome profiling	Gene expression quantification	TCGA-CESC	TCGA-C5-A1BQ	Primary tumor	"Squamous cell carcinoma, keratinizing, NOS"	Dead	604	s1552	0	0	Absence
e7c7783c-1d0f-4f42-a4cf-518825e91d91	TCGA-IR-A3LB-01A	4e20c639-a91c-4acc-a293-6fd7f5e51f3b	d76dffe0-6762-4ae0-a89e-b25deb47a2f4.rna_seq.augmented_star_gene_counts.tsv	Transcriptome profiling	Gene expression quantification	TCGA-CESC	TCGA-IR-A3LB	Primary tumor	"Adenocarcinoma, endocervical type"	Dead	2032	s1569	0	0	Absence
e87fadbe-c58c-41d1-b413-8cf6ce70ce94	TCGA-DG-A2KM-01A	66bade2d-f4cd-499b-8012-6f9cb85ffad4	80d98f92-36e1-40dc-91b9-a0cd5767fd4d.rna_seq.augmented_star_gene_counts.tsv	Transcriptome profiling	Gene expression quantification	TCGA-CESC	TCGA-DG-A2KM	Primary tumor	"Squamous cell carcinoma, NOS"	Alive	1946	s1250	0	0	Absence
e89d0cb1-6ec2-43ee-a6d9-b922b680af34	TCGA-C5-A8XJ-01A	f0ce4573-74a0-4848-ad36-aa8bf2d17e69	8e6cbcf9-f6bb-4b03-af5e-f7b8aaabc5de.rna_seq.augmented_star_gene_counts.tsv	Transcriptome profiling	Gene expression quantification	TCGA-CESC	TCGA-C5-A8XJ	Primary tumor	"Squamous cell carcinoma, NOS"	Alive	4467	s1461	0	0	Absence
e8de2228-3aaa-48ad-a2e4-2940280af6fd	TCGA-ZJ-AAXA-01A	455a4f14-0e32-4e58-81fa-cf607c435e82	b3453dd1-5cf2-4429-9316-99c77ee261fb.rna_seq.augmented_star_gene_counts.tsv	Transcriptome profiling	Gene expression quantification	TCGA-CESC	TCGA-ZJ-AAXA	Primary tumor	"Squamous cell carcinoma, large cell, nonkeratinizing, NOS"	Alive	43	s1495	0	0	Absence
e8e16aaf-3621-4ce8-b02a-7893dd656e4d	TCGA-C5-A1M7-01A	7cc593e0-16f0-4258-97b9-20999c1b9b9c	910d2cfd-71fd-4ebe-be5f-d15579db6efc.rna_seq.augmented_star_gene_counts.tsv	Transcriptome profiling	Gene expression quantification	TCGA-CESC	TCGA-C5-A1M7	Primary tumor	"Squamous cell carcinoma, NOS"	Alive	1409	s1230	0	0	Absence
e8f07d20-d043-4c69-8898-87d0f0fc5a9a	TCGA-C5-A901-01A	fc147e90-d225-4f86-958b-95cd2b18d44e	bbbe0d43-4b00-4158-8419-aa7d25ae12b7.rna_seq.augmented_star_gene_counts.tsv	Transcriptome profiling	Gene expression quantification	TCGA-CESC	TCGA-C5-A901	Primary tumor	"Squamous cell carcinoma, keratinizing, NOS"	Alive	518	s1592	0	0	Absence
eb0eb159-732e-43ff-a402-7f2d9f67daa8	TCGA-EX-A449-01A	26300881-c64f-449b-aa14-179e4f6de540	66343a76-a317-4a7e-b4f0-64c0aeebdb55.rna_seq.augmented_star_gene_counts.tsv	Transcriptome profiling	Gene expression quantification	TCGA-CESC	TCGA-EX-A449	Primary tumor	"Adenocarcinoma, endocervical type"	Alive	447	s1285	0	0	Absence
eb3ba1fb-8254-4c02-a982-507f075cbac1	TCGA-ZJ-A8QO-01A	b42b7e5b-6566-4d6b-82c2-cddd3075e4e7	ac5e69d2-35cc-4cf1-82fb-bea2dcf703b4.rna_seq.augmented_star_gene_counts.tsv	Transcriptome profiling	Gene expression quantification	TCGA-CESC	TCGA-ZJ-A8QO	Primary tumor	"Squamous cell carcinoma, large cell, nonkeratinizing, NOS"	Alive	0	s1309	0	0	Absence
eb59cf69-1997-41b9-bf69-69ad7da292a1	TCGA-C5-A1MQ-01A	7bf1fb28-ccb7-46f2-8248-94da60ebd9be	1295a549-7033-4914-86e5-2a43c0ae3d1a.rna_seq.augmented_star_gene_counts.tsv	Transcriptome profiling	Gene expression quantification	TCGA-CESC	TCGA-C5-A1MQ	Primary tumor	"Squamous cell carcinoma, NOS"	Alive	1031	s1441	0	0	Absence
ec609ebe-2db9-4b95-a154-512fdfa9038f	TCGA-DS-A1OD-01A	cb82a64c-0991-46e9-b74b-afad025c3865	284bfaba-de95-4040-9695-7180fda5e86d.rna_seq.augmented_star_gene_counts.tsv	Transcriptome profiling	Gene expression quantification	TCGA-CESC	TCGA-DS-A1OD	Primary tumor	"Squamous cell carcinoma, NOS"	Alive	3874	s1395	0	0	Absence
ed17685c-b706-41e4-8a76-11cb0e6700cd	TCGA-EA-A5FO-01A	654f72e5-4599-4cee-a1a1-b9d2cf88945f	4c9760aa-ad49-4f0f-ad72-583a500568ac.rna_seq.augmented_star_gene_counts.tsv	Transcriptome profiling	Gene expression quantification	TCGA-CESC	TCGA-EA-A5FO	Primary tumor	"Squamous cell carcinoma, NOS"	Alive	815	s1434	0	0	Absence
ed6d989d-da09-4818-8fed-f33d88b628af	TCGA-DS-A0VM-01A	e0bbcf72-33a3-481c-8daf-4ca22c5375ca	ebfe35f9-cfc5-4539-8a86-c56f3db2c569.rna_seq.augmented_star_gene_counts.tsv	Transcriptome profiling	Gene expression quantification	TCGA-CESC	TCGA-DS-A0VM	Primary tumor	"Squamous cell carcinoma, NOS"	Alive	3589	s1220	0	0	Absence
ed74703a-6838-4f4e-9524-d6fb7b208687	TCGA-MA-AA43-01A	3c9054d3-eb05-4c92-ae36-10114c271778	c217b4e6-9478-4f93-bb70-31b5632e08ff.rna_seq.augmented_star_gene_counts.tsv	Transcriptome profiling	Gene expression quantification	TCGA-CESC	TCGA-MA-AA43	Primary tumor	"Squamous cell carcinoma, NOS"	Alive	346	s1482	0	0	Absence
ee2c9743-eaa1-4f0d-8d35-e96686ac3913	TCGA-VS-A9UM-01A	b647fcd7-b37c-4727-a308-2cee20ecf263	e084dfeb-c10f-46cf-a8c0-7e7f23c9af4c.rna_seq.augmented_star_gene_counts.tsv	Transcriptome profiling	Gene expression quantification	TCGA-CESC	TCGA-VS-A9UM	Primary tumor	"Squamous cell carcinoma, NOS"	Dead	829	s1321	0	0	Absence
f0bb0d18-1190-463d-a0ba-839c2c776794	TCGA-JW-A5VJ-01A	73d8259f-f94a-4381-8cd1-c8ea6586b942	8678f216-bace-4923-bfa6-6e64bce2ddc3.rna_seq.augmented_star_gene_counts.tsv	Transcriptome profiling	Gene expression quantification	TCGA-CESC	TCGA-JW-A5VJ	Primary tumor	"Squamous cell carcinoma, NOS"	Alive	652	s1436	0	0	Absence
f0cfaacc-30e5-4e54-b33a-f0fd5dad620e	TCGA-VS-A9UP-01A	8b2e453a-da51-4f08-befd-98cafa198a98	2d70ee13-be72-4c82-8f66-98255b4d9e04.rna_seq.augmented_star_gene_counts.tsv	Transcriptome profiling	Gene expression quantification	TCGA-CESC	TCGA-VS-A9UP	Primary tumor	"Mucinous adenocarcinoma, endocervical type"	Alive	1444	s1339	0	0	Absence
f0daf315-8909-4cda-886d-a2770b08db94	TCGA-ZJ-AB0H-01A	6ad74862-f1f0-452e-ac80-1177e10634f7	4f303088-03d5-4a65-979c-f35b4fd8e1b2.rna_seq.augmented_star_gene_counts.tsv	Transcriptome profiling	Gene expression quantification	TCGA-CESC	TCGA-ZJ-AB0H	Primary tumor	"Squamous cell carcinoma, large cell, nonkeratinizing, NOS"	Alive	0	s1335	0	0	Absence
f150d999-cdec-427e-b8b2-00731c648989	TCGA-HM-A3JJ-01A	47b3dc62-b0c0-4cd2-9369-cb6a3b7bcd75	39bb8a6b-c19f-41a5-b851-430866904d2d.rna_seq.augmented_star_gene_counts.tsv	Transcriptome profiling	Gene expression quantification	TCGA-CESC	TCGA-HM-A3JJ	Primary tumor	"Squamous cell carcinoma, NOS"	Dead	659	s1242	0	0	Absence
f241d6b1-2c32-4478-8f8d-8c746464f7d1	TCGA-LP-A4AV-01A	37e5523e-6126-4402-83f7-279eba9574c5	d942811c-b976-4faa-81c5-2475fe50751d.rna_seq.augmented_star_gene_counts.tsv	Transcriptome profiling	Gene expression quantification	TCGA-CESC	TCGA-LP-A4AV	Primary tumor	"Squamous cell carcinoma, keratinizing, NOS"	Alive	0	s1447	255	0.120345	Presence
f24ed9c0-92bb-4003-86d2-42ab26617a05	TCGA-IR-A3LH-01A	bc9564d3-a0f8-4315-a6c3-cfaaa02babf6	02d8ff03-2fe1-4988-9586-47726d53a6a5.rna_seq.augmented_star_gene_counts.tsv	Transcriptome profiling	Gene expression quantification	TCGA-CESC	TCGA-IR-A3LH	Primary tumor	"Squamous cell carcinoma, NOS"	Alive	2394	s1417	0	0	Absence
f2bea37e-0d19-49e1-91a0-a4de4dfa2d35	TCGA-VS-A959-01A	8cf0a96e-9a9c-4441-97dd-651c125685e8	c3a41b4e-a281-4a31-8339-2119583e5eeb.rna_seq.augmented_star_gene_counts.tsv	Transcriptome profiling	Gene expression quantification	TCGA-CESC	TCGA-VS-A959	Primary tumor	"Squamous cell carcinoma, NOS"	Alive	1561	s1329	0	0	Absence
f2c901d1-2039-4046-89b5-c2d45bcf10c3	TCGA-C5-A7CG-01A	5ed01de4-703a-4303-a10e-147ff3a3db1d	206eb348-da6c-479f-96c0-a963e91718a4.rna_seq.augmented_star_gene_counts.tsv	Transcriptome profiling	Gene expression quantification	TCGA-CESC	TCGA-C5-A7CG	Primary tumor	"Squamous cell carcinoma, NOS"	Alive	6408	s1277	0	0	Absence
f3cbadb3-3b83-47cd-b8a0-b0e10343a295	TCGA-Q1-A5R2-01A	b7b2bcd7-5f8a-4899-bec9-49b85b742056	e8b1550a-a4f1-4e6f-baf8-790bb28805dd.rna_seq.augmented_star_gene_counts.tsv	Transcriptome profiling	Gene expression quantification	TCGA-CESC	TCGA-Q1-A5R2	Primary tumor	"Squamous cell carcinoma, NOS"	Alive	499	s1439	0	0	Absence
f40468de-3b86-4922-9951-f8ae28da6af0	TCGA-BI-A20A-01A	9380b1a4-9278-4016-a817-e333c17b551a	5f5aff8a-6f46-474b-ae50-60d31d4f5a79.rna_seq.augmented_star_gene_counts.tsv	Transcriptome profiling	Gene expression quantification	TCGA-CESC	TCGA-BI-A20A	Primary tumor	"Squamous cell carcinoma, NOS"	Alive	720	s1400	0	0	Absence
f5d90810-8c4b-4ced-9360-383e42cb54b3	TCGA-EX-A3L1-01A	99a28804-dba8-4cae-a214-a9d7582f4e57	fe1143fd-17c3-4653-b033-98df694f6f73.rna_seq.augmented_star_gene_counts.tsv	Transcriptome profiling	Gene expression quantification	TCGA-CESC	TCGA-EX-A3L1	Primary tumor	"Squamous cell carcinoma, NOS"	Alive	463	s1287	0	0	Absence
f727fcb9-e457-4643-9468-f739133b7e9c	TCGA-EK-A3GN-01A	bc9769b2-4732-4bc6-b9e2-f0024db0a965	3a17070b-2b26-4bc2-9f5f-5c617ab9a83f.rna_seq.augmented_star_gene_counts.tsv	Transcriptome profiling	Gene expression quantification	TCGA-CESC	TCGA-EK-A3GN	Primary tumor	"Squamous cell carcinoma, NOS"	Alive	27	s1246	0	0	Absence
f8ab17ec-c365-41a6-a4bc-36653e84bce5	TCGA-MY-A5BE-01A	832c6f5b-6283-46da-8226-ca5eb9a7742a	d854b2c4-3122-4769-8116-51c99fa163cb.rna_seq.augmented_star_gene_counts.tsv	Transcriptome profiling	Gene expression quantification	TCGA-CESC	TCGA-MY-A5BE	Primary tumor	"Squamous cell carcinoma, NOS"	Alive	1066	s1574	0	0	Absence
f8d342f5-9b92-42e1-8b0d-0876cc26965d	TCGA-DS-A0VN-01A	e340467a-6871-49e9-8d53-9fdce69ca4f1	be86c4bd-ac41-405f-b3ca-7a4a4d72af08.rna_seq.augmented_star_gene_counts.tsv	Transcriptome profiling	Gene expression quantification	TCGA-CESC	TCGA-DS-A0VN	Primary tumor	"Squamous cell carcinoma, NOS"	Alive	3609	s1560	0	0	Absence
f8f470d2-924f-41dd-92c5-516b0bf68e44	TCGA-C5-A7CJ-01A	fa4d7bf7-cc9a-4b12-839e-8967769c1582	adb70248-8c0e-4d90-b0bd-e4fef3b86e95.rna_seq.augmented_star_gene_counts.tsv	Transcriptome profiling	Gene expression quantification	TCGA-CESC	TCGA-C5-A7CJ	Primary tumor	"Squamous cell carcinoma, keratinizing, NOS"	Dead	3097	s1444	132	0.222256	Presence
f92a994d-b080-42c9-966f-34c1000865e3	TCGA-EK-A2RB-01A	87330fc3-56fb-43b4-80a9-d54dc91fec52	94052f8d-57e2-46c5-b39d-1b0a65cc3c9e.rna_seq.augmented_star_gene_counts.tsv	Transcriptome profiling	Gene expression quantification	TCGA-CESC	TCGA-EK-A2RB	Primary tumor	"Squamous cell carcinoma, NOS"	Alive	9	s1426	0	0	Absence
f93ccd2d-3c77-4bd3-8cac-5203bd57735f	TCGA-Q1-A5R1-01A	df403450-7fc1-4822-b8fd-479ac2b1038a	c9b691ec-7a21-45fc-b436-0c9af1f63112.rna_seq.augmented_star_gene_counts.tsv	Transcriptome profiling	Gene expression quantification	TCGA-CESC	TCGA-Q1-A5R1	Primary tumor	"Mucinous adenocarcinoma, endocervical type"	Alive	474	s1270	0	0	Absence
fb4af6b2-4bed-4dbe-9309-29f59ed30fb2	TCGA-JW-A69B-01A	5a6b8377-8628-4aca-897b-73b673f31595	9dbbd5e0-ec5d-43f3-a06f-1e4e3d37a56e.rna_seq.augmented_star_gene_counts.tsv	Transcriptome profiling	Gene expression quantification	TCGA-CESC	TCGA-JW-A69B	Primary tumor	"Adenocarcinoma, endocervical type"	Alive	863	s1283	0	0	Absence
fb66b7f5-22ca-4d4d-97c2-30e6edfff781	TCGA-C5-A2LT-01A	79129c37-22cb-4d6a-9be7-8bbe57db05ed	6a0868ef-425c-4d1b-af4d-061cf476ff20.rna_seq.augmented_star_gene_counts.tsv	Transcriptome profiling	Gene expression quantification	TCGA-CESC	TCGA-C5-A2LT	Primary tumor	"Squamous cell carcinoma, keratinizing, NOS"	Alive	2226	s1239	0	0	Absence
fc2bce29-4685-49f5-b901-2117bf673bb8	TCGA-MA-AA3W-01A	c9c2991a-b071-45e4-8855-7b82fb8adb83	d7d35f20-0826-4ee5-9fc1-10dfb1b9a8ae.rna_seq.augmented_star_gene_counts.tsv	Transcriptome profiling	Gene expression quantification	TCGA-CESC	TCGA-MA-AA3W	Primary tumor	"Squamous cell carcinoma, NOS"	Alive	685	s1313	579	0.464378	Presence
ff3808e4-eece-4046-819b-fe1019317f8e	TCGA-C5-A7CO-01A	8cc5504e-a8b9-4d19-8caa-05a941b5a41f	94991eba-ab53-4e21-b4c2-e86fd5c20a23.rna_seq.augmented_star_gene_counts.tsv	Transcriptome profiling	Gene expression quantification	TCGA-CESC	TCGA-C5-A7CO	Primary tumor	"Squamous cell carcinoma, NOS"	Alive	4482	s1451	0	0	Absence
ffd8d31f-bc4b-4e19-bbaf-0e26e9f3a107	TCGA-XS-A8TJ-01A	01e52273-4552-46a4-9e03-b99d4d1a40c2	f3491776-22a7-4fac-baf0-2d2995b42572.rna_seq.augmented_star_gene_counts.tsv	Transcriptome profiling	Gene expression quantification	TCGA-CESC	TCGA-XS-A8TJ	Primary tumor	"Squamous cell carcinoma, large cell, nonkeratinizing, NOS"	Alive	890	s1470	0	0	Absence
NOS, not otherwise specified; uuid, universally unique identifier; TCGA, The Cancer Genome Atlas.
